1    **Engineering functional human gastrointestinal organoid tissues using the three primary**  
2    **germ layers separately derived from pluripotent stem cells**

3

4    Alexandra K. Eicher<sup>1,2,3</sup>, Daniel O. Kechele<sup>2,3</sup>, Nambirajan Sundaram<sup>2,4</sup>, H. Matthew Berns<sup>2,3</sup>,  
5    Holly M. Poling<sup>2,4</sup>, Lauren E. Haines<sup>2,3</sup>, J. Guillermo Sanchez<sup>1,2,3</sup>, Keishi Kishimoto<sup>3,6,7</sup>, Mansa  
6    Krishnamurthy<sup>2,5</sup>, Lu Han<sup>2,3</sup>, Aaron M. Zorn<sup>2,3</sup>, Michael A. Helmrath<sup>2,4</sup>, James M. Wells<sup>2,3,5,8\*</sup>

7

8    <sup>1</sup>College of Medicine, University of Cincinnati, Cincinnati, OH, 45267, USA; <sup>2</sup>Center for Stem  
9    Cell and Organoid Medicine (CuSTOM), Divisions of <sup>3</sup>Developmental Biology, <sup>4</sup>Pediatric  
10   General and Thoracic Surgery, <sup>5</sup>Endocrinology, Cincinnati Children's Hospital Medical Center  
11   (CCHMC), Cincinnati, OH, 45229, USA; <sup>6</sup>CuSTOM-RIKEN BDR Collaborative Laboratory,  
12   CCHMC, Cincinnati, OH, 45229, USA; <sup>7</sup>Laboratory for Lung Development, RIKEN Center for  
13   Biosystems Dynamics Research (BDR), Kobe, 650-0047, Japan. <sup>8</sup>Lead Contact and  
14   Corresponding Author

15

16   \*Corresponding Author's e-Mail Address: [james.wells@cchmc.org](mailto:james.wells@cchmc.org)

17 **SUMMARY**

18 The development of human organoid model systems has provided new avenues for patient-  
19 specific clinical care and disease modeling. However, all organoid systems are missing important  
20 cell types that, in the embryo, get incorporated into organ tissues during development. Based on  
21 the concept of how embryonic organs are assembled, we developed an organoid assembly  
22 approach starting with cells from the three primary germ layers; enteric neuroglial, mesenchymal,  
23 and epithelial precursors, all separately derived from human pluripotent stem cells. From these  
24 we generated human gastric tissue containing differentiated glands, surrounded by layers of  
25 smooth muscle containing functional enteric neurons that controlled contractions of the  
26 engineered tissue. We used this highly tractable system to identify essential roles for the enteric  
27 nervous system in the growth and regional identity of the gastric epithelium and mesenchyme and  
28 for glandular morphogenesis of the antral stomach. This approach of starting with separately-  
29 derived germ layer components was applied to building more complex fundic and esophageal  
30 tissue, suggesting this as a new paradigm for tissue engineering.

31

32

33 **Keywords:** tissue engineering, gastric, enteric nervous system, mesenchyme, human

34 pluripotent stem cells, Brunner's glands

## 35 INTRODUCTION

36 All organs of the gastrointestinal (GI) tract are assembled from cells derived from the  
37 three primary germ layers during embryonic development. These diverse cell types are required  
38 for the proper execution of the GI tract's complex functions. For example, key functions of the  
39 stomach to chemically and mechanically breakdown orally ingested nutrients depend on a  
40 complex interaction of the epithelium to produce acid and proteases, the smooth muscle to  
41 contract and relax, and the enteric nerves to provide input and coordinate both of these  
42 processes (Eicher, Berns and Wells, 2018). These three main components of the stomach  
43 develop separately from the three primary germ layers with the endoderm forming the epithelial  
44 lining, the mesoderm contributing to the stromal cells and smooth muscle layers, and the  
45 ectoderm giving rise to the enteric nervous system (ENS), yet come together to form a complete  
46 and complex layered structure that is functional by the time of birth. Then, each germ layer  
47 plays essential roles in postnatal function. The gastric ENS, as an intrinsic postganglionic  
48 network of excitatory and inhibitory neurons, along with the vagus nerve, coordinates the  
49 epithelial release of acid and proteases (Furness *et al.*, 2020; Zhao *et al.*, 2008; Norlen *et al.*,  
50 2005; Rydning *et al.*, 2002) and the relaxation of smooth muscle needed for gastric emptying  
51 (Sung *et al.*, 2018; Beckett, Sanders and Ward, 2017; Shaylor *et al.*, 2016; Li *et al.*, 2011).

52 During organ development, the ENS, mesenchyme, and epithelium communicate with  
53 each other in a temporally dynamic manner to regulate regional identity, morphogenesis, and  
54 differentiation of progenitors into specific cell types (Le Guen *et al.*, 2015). For example, neural  
55 progenitors of the ENS, enteric neural crest cells (ENCCs), actively migrate to the foregut tube  
56 in response to signals from the surrounding mesenchyme at the same time as this mesenchyme  
57 is differentiating into multiple, organized layers of smooth muscle. Work with chick embryos  
58 have identified specific signaling pathways that mediate reciprocal signaling between germ  
59 layers. One common reciprocal signaling module involves sonic hedgehog (Shh), which is  
60 secreted by the epithelium of several developing organ and regulates expression of bone

61 morphogenetic protein (BMP) in adjacent mesenchyme. BMP activation then mediates  
62 secondary responses such as patterning the developing gut tube mesenchyme (Roberts *et al.*,  
63 1995; Roberts *et al.*, 1998; Faure *et al.*, 2002; De Santa Barbara *et al.*, 2005) and inducing  
64 epithelial cell fates like the pyloric sphincter at the junctions of developing organs (Smith and  
65 Tabin, 1999; Smith *et al.*, 2000; Moniot *et al.*, 2004; Theodosiou and Tabin, 2005). Epithelial  
66 Shh is also known to indirectly regulate ENCC proliferation and differentiation through  
67 manipulation of key extracellular matrix proteins within the gut mesenchyme (Nagy *et al.*, 2016).  
68 Additional studies in chick embryos have shown that ENCCs are required for and regulate the  
69 growth, patterning, and maturation of developing stomach mesenchyme (Faure *et al.*, 2015).  
70 Finally, recent work using both chick and mouse embryos have also shown that both epithelial  
71 Shh-induced BMP signaling and ENCC-produced BMP antagonists work in spatiotemporal  
72 concert to regulate the radial position of the gut's smooth muscle layers (Huycke *et al.*, 2019).

73 Congenital disorders arising from improper ENS and smooth muscle development  
74 include neuropathies that can impact the function of the proximal GI tract (Westfal and  
75 Goldstein, 2017). This results in dysregulation of motility and gastroesophageal reflux disease,  
76 collectively described as abnormal gastric emptying. A much more common gastric dysfunction  
77 that develops postnatally is gastroparesis. This involves an inability of the pyloric sphincter to  
78 relax in coordination with gastric contraction, preventing gastric contents from exiting the  
79 stomach which causes bloating and nausea. While the cause of this disorder is unknown, recent  
80 work using mouse embryos suggest it may be the result of hypoganglionosis or inflammatory  
81 degradation of intrinsic nNOS-expressing inhibitory neurons (Baker *et al.*, 2020; Westfal and  
82 Goldstein, 2017). Surprisingly little is known about gastric ENS development in any model  
83 system, and development of a functional human gastric model system could accelerate not only  
84 the study of environmental and genetic factors impacting gastric motility, but also the  
85 discoveries of new therapies to improve gastric function.

86           While animal models have been invaluable to study stomach development and disease  
87 (de Santa Barbara, van den Brink and Roberts, 2002), there are major structural and functional  
88 differences in this organ between different species. For example, rodents have a forestomach  
89 that does not exist in humans. The avian stomach contains a proventriculus, which is a proximal  
90 glandular compartment, somewhat paralleling the human fundus, and a gizzard, which is a more  
91 distal grinding compartment that is vastly different than the human antrum (Kim and Shivdasani,  
92 2016). There are also developmental differences at the molecular level; Hedgehog signaling  
93 appears to play opposite roles in the development of GI smooth muscle between chick and  
94 mouse embryos (Huycke *et al.*, 2019). Each of the existing model systems have unique  
95 experimental strengths and weaknesses to study how the stomach forms from the three  
96 separate germ layers. Chick embryos are easy to manipulate *in vitro*, but are not a good genetic  
97 model. In contrast, mice are a strong genetic model, but germ layer specific studies *in vivo* are  
98 technically demanding or impossible.

99           We reasoned that by recapitulating organ assembly from the three germ layers *in vitro*  
100 we could both construct a more complex organoid and study human organ development in a  
101 way not previously possible. In this study, we incorporated human pluripotent stem cell (hPSC)-  
102 derived splanchnic mesenchyme and ENCCs into developing human antral and fundic gastric  
103 organoids (hAGO and hFGO, respectively) to recapitulate normal gastric development. The  
104 resulting gastric organoids were composed of epithelial glands surrounded by multiple layers of  
105 functionally innervated smooth muscle. The technology was readily transferrable to other types  
106 of organoids and was used to engineer esophageal organoids containing all three germ layers.  
107 The tractability of this approach allowed us to study germ layer communication during stomach  
108 development. We found that human ENCCs promote gastric mesenchymal development and  
109 glandular morphogenesis and that the presence of adequate amount of gastric mesenchyme is  
110 essential for maintaining gastric regional identity.

111

## 112 RESULTS

### 113 Deriving mesenchyme from hPSCs and incorporation into gastric organoids

114 One of the first and most critical steps in GI development is the assembly of epithelium  
115 and mesenchyme into a primitive gut tube. Establishing this basic epithelial-mesenchymal  
116 structure is essential for all subsequent stages of GI development. While PSC-derived human  
117 gastric organoids have a full complement of epithelial cell types (McCracken *et al.*, 2014;  
118 McCracken *et al.*, 2017), they do not intrinsically develop a robust mesenchyme. We therefore  
119 developed an approach to generate GI mesenchyme from hPSCs that could be incorporated  
120 into gastric organoids. Previous work identified a method to direct the differentiation of hPSCs  
121 into splanchnic mesenchyme (SM), the source of gastric mesenchyme (Han *et al.*, 2020). This  
122 method was based on the signaling pathways that drive the normal development of GI  
123 mesenchyme and yields a robust population of SM. Briefly, hPSCs were differentiated into  
124 lateral plate mesoderm (LPM) with TGF $\beta$  inhibition, WNT inhibition, and BMP activation as  
125 previously published (Figure 1A) (Han *et al.*, 2020; Loh *et al.*, 2016). As LPM can give rise to  
126 both cardiac and SM, the LPM was treated with retinoic acid (RA) to induce a SM fate, resulting  
127 in loss of cardiac markers and an increase in expression of SM markers like *FOXF1* (Figure 1B-  
128 C) (Han *et al.*, 2020).

129 We investigated several approaches to incorporate mesenchyme into developing gastric  
130 organoids, including combining mesenchyme and epithelium at different epithelial  
131 developmental stages (i.e., at either day 6 or day 9 of the hAGO protocol), testing a single cell  
132 aggregation method versus using intact epithelial organoids, and utilizing differently patterned  
133 mesenchymal populations, including splanchnic, cardiac, septum transversum, and gastric-  
134 esophageal mesenchyme. To monitor this mesenchymal incorporation in real time, we derived  
135 the mesenchyme from an hPSC line with constitutive GFP expression. We ultimately found that  
136 starting with a single cell suspension of SM that was aggregated with intact posterior foregut  
137 spheroids on day 6 of the hAGO protocol (Figure 1A) resulted in optimal mesenchymal

138 incorporation that yielded the most added exogenous mesenchyme while still retaining the small  
139 portion of endogenous mesenchyme (Figure S1). To determine this, we initially compared  
140 incorporation of varying concentrations of SM and septum transversum (STM) mesenchyme on  
141 day 6 of the hAGO protocol. Visual qualitative assessment of brightfield images of 4 week *in*  
142 *vitro* hAGOs recombined with either SM or STM mesenchyme show that recombining SM with  
143 hAGO spheroids at a concentration of 50,000 cells/well of approximately 20-30 hAGO spheroids  
144 (equating to an approximate 2:1 ratio of SM cells to hAGO epithelial cells) resulted in end  
145 timepoint hAGOs +SM that retained an epithelium of visually similar size to hAGO controls (Fig.  
146 S1A). We then compared 4 week *in vitro* hAGOs that were recombined with either SM on day 6  
147 of the hAGO protocol or regionally patterned gastric-esophageal mesenchyme (GEM) on day 9  
148 of hAGO protocol (Figure 1D, S1B). After 4 weeks growth *in vitro*, hAGO +SM had a robust and  
149 uniform layer of GFP+ mesenchymal cells expressing the early SM marker FOXF1 surrounding  
150 the gastric epithelium (Figure 1D), while hAGO +GEM still showed a nonuniform layer of GFP+  
151 mesenchyme (Figure S1B). In gastric organoids +SM, a third to a half of all cells were  
152 mesenchyme, representing a 3-5-fold increase over control organoids without added  
153 mesenchyme (Figure 1E, S1C). However, in hAGOs +GEM only about a fourth of all cells were  
154 mesenchyme (Figure S1C). This was even less for hAGOs +STM (Figure S1C). Overall,  
155 mesenchymal populations of SM and CM recombined on day 6 of the hAGO protocol yielded  
156 more GFP+ and GFP+/FOXF+ mesenchyme in 4 week *in vitro* hAGOs cultures than populations  
157 of GEM and STM that were recombined on day 9 of the hAGO protocol (Figure S1C). Then,  
158 between SM and CM populations recombined on day 6, hAGOs +SM retained more  
159 endogenous FOXF1+ mesenchyme than hAGOs +CM (Figure S1C). Taken together, we  
160 determined that SM recombined with posterior foregut spheroids on day 6 of the hAGO protocol  
161 resulted in mesenchymal incorporation that yielded the high populations of both endogenous  
162 and exogenous mesenchyme. Finally, in hAGOs +SM we see very rare GFP+ mesenchymal  
163 cells that showed the capacity to differentiate *in vitro* into  $\alpha$ SMA+ smooth muscle (Figure 1F).

164 We show one image where we see this phenomenon. Otherwise, mesenchymal cells do not  
165 differentiate *in vitro* into  $\alpha$ SMA+ smooth muscle. This process only occurs after transplantation  
166 onto a vascular bed in immunocompromised mice.

167 Similarly, other aspects of GI organoid growth and morphogenesis are also limited *in*  
168 *vitro* but upon transplantation, intestinal and colonic organoids continue their growth and  
169 maturation (Watson et al. 2014). To fully investigate which organoid engineering approach  
170 would yield the most characteristic stomach tissue containing glandular units of simple columnar  
171 epithelium surrounded by multiple layers of differently oriented smooth muscle layers, all  
172 organoids were transplanted into mice and grown for an additional 10 weeks (Table S1). Only  
173 one organoid of a few mm in size was transplanted into each mouse. Most hAGOs without  
174 added mesenchyme did not survive (~60%) and those that did were small containing only a  
175 simple, one-cell layer of thin cuboidal-like epithelium that did not fully differentiate (Figure 2B). In  
176 contrast, hAGOs engineered with exogenous mesenchyme had a high survival rate (100%) and  
177 grew from a few millimeters to 0.5-1.5 cm in diameter, exhibiting up to 1000x increase in volume  
178 in some cases. The mesenchyme differentiated into layers of poorly organized  $\alpha$ SMA+ smooth  
179 muscle that surround a simple layer of hAGO epithelium (Figure 2B). This data suggests that  
180 the incorporation of exogenous mesenchyme promotes engraftment and growth of hAGOs but  
181 does not result in normal gastric tissue with glandular units of simple columnar epithelium.

182

### 183 **Engineering three germ layer human gastric tissue**

184 While SM improved the growth of hAGOs, the smooth muscle was poorly organized and  
185 there was no evidence of epithelial development into the glandular structures that normally form  
186 during human stomach organogenesis. We therefore investigated if incorporation of the  
187 ectodermally-derived enteric neural crest cells (ENCCs), in combination with SM, might result in  
188 more normal stomach development (Figure 2A). ENCCs migrate into the developing gut tube  
189 early in development and form a neuroglial plexus called the enteric nervous system (ENS).



190 There are several published protocols to derived NCCs from hPSCs (Barber, Studer and  
191 Fattahi, 2019), but to recapitulate the spatiotemporal dynamics of this developmental process,  
192 ENCCs were differentiated as previously described (Workman *et al.*, 2017; Bajpai *et al.*, 2010)  
193 and along with SM were aggregated with hAGO spheroids. By using RFP-labeled ENCCs and  
194 GFP-labeled SM we identified conditions that allowed for the incorporation of both germ layers  
195 into hAGOs *in vitro* (Figures S2A and S3G). To allow for organoid growth and maturation we  
196 transplanted the recombined hAGOs into mice for an additional 10-12 weeks. While both  
197 hAGOs +SM and hAGO +SM +ENCC transplants grew to over 1 cm in diameter, only hAGO  
198 +SM +ENCC recombinants formed the stereotypic glandular structures found in the human  
199 stomach (Figures 2B and 3A-B). In addition, we observed several distinct layers of highly  
200 organized smooth muscle that were orientated into distinct layers similar to the organization of  
201 the muscularis mucosa, submucosa, and muscularis externa, containing the inner circular and  
202 outer longitudinal layers of smooth muscle, of the stomach (Figures 2B, 3A-B, and S2E-F). Our  
203 12wk three germ layer hAGOs are more similar in organization to 38wk human stomach tissue  
204 (Figure 3A) when compared to adult human stomach tissue (Figure 3B and S2E-F).” Embedded  
205 within the smooth muscle fibers was a network of enteric neurons arranged in characteristic  
206 plexi (Figure 2B and Movie S1). The first, more proximal, plexus layer in the 12wk three germ  
207 layer hAGO lies in between the more proximal, muscularis mucosa-like muscle layer and the  
208 more distal, muscularis externa-like muscle layer, essentially within a submucosal-like space.  
209 This plexus layer then is spatially similar to the submucosal neuronal plexus of human stomach  
210 tissue. The second, more distal, plexus layer is embedded within the muscularis externa-like  
211 muscle layer, mimicking the organization of the myenteric plexus. This organization is highly  
212 similar to *in vivo* 38 week human stomach tissue (Figure 3A and S2E-F).”.

213 The epithelium of hAGO +SM +ENCC transplants expressed the gastric epithelial  
214 marker CLDN18 and lacked the intestinal epithelial marker CDH17, confirming the gastric  
215 identity of the organoids (Figure 2C, data not shown). hAGO glands contained all of the

216 expected cell types normally found in the antrum of the stomach including surface mucous cells  
217 (MUC5AC), gland mucous cells (MUC6), and endocrine cells expressing ghrelin, serotonin,  
218 histamine, and gastrin (Figure 2C and 3E). The neurons (GFP+) formed a network of fibers  
219 resembling a plexus that was embedded within the layers of smooth muscle. We also observed  
220 GFP+ choline acetyltransferase+ (ChAT+) and dopaminergic (TH+) neurons approximately 120-  
221 160 $\mu$ m away from the glandular epithelium and in close proximity to the endocrine cells such as  
222 ghrelin and gastrin (Figure 2C-E). This association *in vivo* is important as neurotransmitters  
223 control secretion of a variety of stomach hormones including ghrelin and gastrin (Breit *et al.*,  
224 2018).

225

### 226 **Generating fundic tissues containing three germ layers**

227 One of the most prominent domains of the human stomach is the corpus, which contains  
228 fundic (oxyntic) glands with acid producing parietal cells and digestive enzyme secreting chief  
229 cells. The glands are also in close proximity to enteric neurons that, along with gastric endocrine  
230 cells, help to regulate acid production. We investigated if the three germ layer recombinant  
231 approach could also be used to engineer human fundic tissue with the above properties. We  
232 generated early stage hFGOs as previously described (McCracken *et al.*, 2017) and  
233 recombined them with SM and GFP-labeled ENCCs. After four weeks we observed both SM  
234 and ENCCs incorporated into hFGOs (Figure S2H), similar to hAGOs (Figures S2A-D), and  
235 confirmed fundic identity by the presence of ATP4B+ parietal cells and absence of PDX1  
236 (Figure S2H and data not shown).

237 We next investigated if, like hAGOs (Figure S2C), incorporation of SM and ENCCs also  
238 promoted growth, morphogenesis, and maturation of hFGOs engrafted under the murine kidney  
239 capsule (Figure S2G). A comparison of three germ layer hAGOs and hFGOs grown *in vivo* for  
240 10-12 weeks showed that they both grew up to a centimeter in size (Figure S2C and S2G) with  
241 a similar histological architecture to that of 38 week (Figure 3A) and adult (Figure 3B) human

242 fundic tissues, with glandular epithelium surrounded by multiple layers of innervated smooth  
243 muscle (Figure 3A-D. In general, the extent of glandular morphogenesis of transplanted hFGOs  
244 was less than that of hAGOs (Figure 3C-E). Both hAGOs and hFGOs maintained their regional  
245 identity after transplantation, and moreover, the proportions of cell types that normally  
246 distinguish the human corpus/fundic from the antrum also distinguished hAGOs from hFGOs.  
247 Specifically, hAGOs expressed higher levels of PDX1, antral-specific gastrin-expressing  
248 endocrine cells, and MUC5AC<sup>+</sup> surface mucus cells compared to hFGOs (Figure 3E=H).  
249 Conversely, hFGOs contained more ATP4B<sup>+</sup>/GIF<sup>+</sup> parietal cells than the hAGOs, and hFGOs  
250 had fundic-specific PGA3<sup>+</sup> chief cells, which were absent in hAGOs (Figure 3E, 3I-J). Ghrelin-  
251 expressing endocrine cells and PGC<sup>+</sup> chief cells were observed in both regions of the stomach  
252 (Figures 3E, 3K). We previously demonstrated that differentiation of parietal cells *in vitro*  
253 required BMP signaling and MEK inhibition (Figure S2H) (McCracken *et al.*, 2017), however  
254 transplanted hFGOs required no additional factors for robust parietal cell differentiation (Figures  
255 3E, 3I, and 3L-M) demonstrating that the signaling processes that control gastric cell type  
256 specification occur normally in engineered tissue. As observed in human stomach biopsies,  
257 engineered antral tissue does contain parietal cells, but at lower numbers than are found in  
258 fundic glands (Figures 3E, 3I, and 3L-M) (Choi *et al.*, 2014). Furthermore, parietal cells in  
259 hFGOs *in vitro* only expressed the ATP4B<sup>+</sup> subunit of the H<sup>+</sup>/K<sup>+</sup> ATPase and the cellular  
260 localization is primarily cytoplasmic (Figure S2H) while hFGOs matured *in vivo* expressed much  
261 higher levels of both the ATP4A and ATP4B subunits which colocalize on the apical membrane  
262 (Figure 3L) suggesting that these parietal cells are more mature than their *in vitro* counterparts.  
263 Together these data confirm that engineering mesenchyme and ENS cells into hAGOs and  
264 hFGOs results in the formation of gastric tissues that begin to resemble human stomach tissue.

265

266 **Antral three germ layer organoids exhibit functional muscle contraction**

267           The stomach plays an essential role in the mechanical breakdown of food and in  
268 emptying it into the duodenum. This gastric motility involves the ENS, which functionally controls  
269 smooth muscle contractions. To investigate if the ENS and smooth muscle in the three germ  
270 layer hAGOs formed a functional neuromuscular unit, we isolated tissue strips from transplanted  
271 hAGOs and placed them in an organ bath chamber system to monitor contractility. After an  
272 equilibration period, spontaneous contractile oscillations were observed from tissues derived  
273 from 1 hAGO +SM and 3 separate hAGO +SM +ENCC transplants (Figure 4A). The presence  
274 of phasic contractions indicated that intramuscular interstitial cells of Cajal (ICCs) were present  
275 within both the two and three germ layer organoids. However, the contractile activity exhibited in  
276 hAGO +SM had more irregularities than observed in hAGO +SM +ENCC. This was further  
277 supported by the presence of mesenchymal clusters expressing KIT Proto-Oncogene, Receptor  
278 Tyrosine Kinase (c-KIT), a marker of ICCs, that were in close association with TUJ1+ neuroglia  
279 cells (Figure 4B), indicating cooperative coordination of the contractions in hAGO +SM +ENCC  
280 improved their regularity (Ward and Sanders, 2006; Iino and Horiguchi, 2006). These  
281 mesenchymal clusters, approximately 7% of total cells present (Figure 4C), arranged within the  
282 muscularis externa-like muscle layers of the three germ layer hAGO transplants as is  
283 stereotypical in the human stomach. Smooth muscle tone was then interrogated with a dose  
284 response to bethanechol, a muscarinic receptor agonist that directly stimulates smooth muscle  
285 contractions (Figure 4D). The contractility increased in response to bethanechol in a dose-  
286 dependent manner, demonstrating the presence of functional smooth muscle in both hAGO  
287 +SM and hAGO +SM +ENCC. Moreover, we were able to reverse the contractions and induce  
288 muscle relaxation with addition of scopolamine, a muscarinic antagonist, in both groups (Figure  
289 4E). Taken together, these data were indicative of functional muscle tissue in the *in vivo*  
290 engrafted hAGOs.

291           We next investigated if the ENS that we engineered into hAGOs was functionally  
292 capable of controlling gastric tissue contractions. Electrical field stimulation (EFS) of tissues is

293 an experimental means to trigger neuronal firing and subsequent smooth muscle contraction.  
294 EFS pulses were administered to two and three germ layer hAGO muscle strips and only  
295 resulted in an increase in contractile activity in hAGO +SM +ENCC, indicating that the ENS was  
296 regulating smooth muscle (Figure 4F). To show that there was a functional connection between  
297 the ENS and smooth muscle, we inhibited ENS activity with the neurotoxin tetrodotoxin (TTX),  
298 which abolished the ability of EFS to stimulate contractile activity (Figure 4G). Lastly, we  
299 investigated the involvement of nitrenergic and cholinergic neuronal activity in regulating smooth  
300 muscle contractions. We inhibited nitric oxide synthetase (nNOS)-expressing neurons with NG-  
301 nitro-L-arginine methyl ester (L-NAME), a nitric oxide synthesis inhibitor, and inhibited cholinergic  
302 neurons using atropine, an acetylcholine (Ach) receptor antagonist. Contractile activity was  
303 measured following control stimulation and stimulation after compound exposure and was  
304 expressed as the change in the area under the curve (AUC) immediately before and after each  
305 EFS stimulation (Figure 4H). These data provide insight into the proportions of nitrenergic and  
306 cholinergic neuronal activity compared to the total ENS activity (control EFS) and show that  
307 gastric tissue contractions involved both nitrenergic and cholinergic neuronal activities.

308

### 309 **Three germ layer esophageal organoids**

310 To test whether our approach of combining tissue from three germ layers was broadly  
311 applicable to engineering other organs, we attempted to incorporate SM and ENCCs into  
312 developing human esophageal organoids (HEOs) (Trisno et al., 2018). Like hAGOs and hFGOs,  
313 we started with HEOs that are largely epithelial and added GFP-labeled SM (Figure S3A-B).  
314 After four weeks *in vitro* HEOs +SM had a robust layer of GFP+ mesenchyme surrounding the  
315 epithelium (Figure S3A) with a high percent of these co-expressing FOXF1 or the more  
316 differentiated marker vimentin (VIM) (Figure S3A). Quantification showed that control HEOs only  
317 contain ~1% of endogenous mesenchyme while HEOs +SM contain ~25% mesenchymal cells  
318 (Figure S3B). Interestingly the addition of exogenous, GFP+ mesenchyme facilitated the

319 expansion of endogenous FOXF1+/GFP- mesenchyme in the cultures, suggesting cell-cell  
320 interactions promote the growth and development of both the organoid epithelium and  
321 mesenchyme.

322 We next incorporated ENCCs into HEOs with or without SM (Figure S3C-H). After 1  
323 month of *in vitro* culture, the ENCCs in HEOs without SM had differentiated into  
324 TUJ1/MAP2/NESTIN<sup>+</sup> enteric neurons that aggregated tightly around the epithelium and did  
325 not organize into a neuronal plexus (Figure S3D-E). In contrast when both ENCCs and  
326 splanchnic mesenchyme were recombined with HEO epithelium we did observed robust co-  
327 development of TUJ1<sup>+</sup> neuronal plexus associated within FOXF1<sup>+</sup> mesenchymal layer (Figure  
328 S3F-I). Overall, these finding show that different human GI organ tissues can be engineered by  
329 combining progenitors from all three germ layers and emphasize the importance of reciprocal  
330 cell-cell communication between the epithelial, mesenchymal, and ENCCs for proper assembly  
331 and function of embryonic organs.

332

333 **ENCCs differentiation into ENS neuroglial cell types does not require the addition of**  
334 **exogenous mesenchyme.**

335 One of the most powerful aspects of this system is the ability to study interactions  
336 between cell types of different germ layers that drive normal tissue formation. For example, our  
337 findings suggested that the presence of ENCCs was important for the development of both the  
338 smooth muscle and the gastric epithelium. Without ENCCs, mesenchyme formed a small layer  
339 of disorganized smooth muscle and the gastric epithelium failed to undergo glandular  
340 morphogenesis. We decided to take advantage of the fact that we can add or remove germ  
341 layers at will to interrogate how ENCCs impact the development of the other germ layers. We  
342 first independently differentiated hPSCs into migrating vagal-like ENCCs (Figure S4A) that after  
343 two weeks *in vitro* expressed key ENCCs markers, including SOX10, AP2A, and p75 (Figure  
344 S4C), and upregulated key neural crest specifier genes SOX9, SOX10, and SNAIL2 (Figure

345 S4D). We then recombined ENCCs with hAGOs at two different timepoints, day 6 and day 9 of  
346 gastric organoid development, and determined their ability to form ENS cell types without  
347 exogenous mesenchyme (Figure 5A). The rationale for recombining ENCCs at day 9 was to  
348 avoid exposing ENCCs to retinoic acid (RA) and noggin (NOG) that are in the hAGO cultures  
349 between days 6-9 as it was previously shown that addition of RA to ENCCs in monolayer culture  
350 posteriorized their axial identity as indicated by upregulation of regional Hox genes HOXB3,  
351 HOXB5, and HOXB7 (Fig S4E) (Simoes-Costa and Bronner, 2015; Workman *et al.*, 2017).  
352 Surprisingly at either time point, ENCCs incorporated well into hAGOs and formed a 3D network  
353 of TUJ1+ neurons and S100b+ glial cells adjacent to gastric epithelium (Figure S4B, F-H and  
354 Movie S2). ENCCs differentiated into a diverse array of neuroglial subtypes, including inhibitory  
355 (nNOS), interneurons (Synaptophysin), dopaminergic (TH), sensory (Calbindin) neurons, and  
356 glial cells (GFAP) (Figure S4I and Table S2). GFAP cells represent approximately 2% of the  
357 total cells present within 4 week *in vitro* hAGOs +ENCC (Figure S4J). ENCCs did not alter gross  
358 hAGOs growth or morphology after four weeks of development *in vitro* (Figure S4B). However,  
359 ENS development was abnormal. Neurons were found immediately adjacent to the gastric  
360 epithelium and were disorganized as compared to mouse E13.5 embryonic stomach (Figure  
361 S4K-L). There were, however, a comparable number of nNOS+ inhibitory neurons present in  
362 hAGOs +ENCC compared to mouse E13.5 stomach (Figure S4M-N). These data show that  
363 ENCCs incorporated into hAGOs differentiated into neuroglial subtypes without the addition of  
364 exogenous mesenchyme, but that proper spatial orientation and ENS plexus development likely  
365 requires a robust population of mesenchyme.

366

### 367 **ENS cells promote the growth and gastric identity of mesenchyme**

368 Previous studies in developing chicken embryos suggest that ENCCs are involved in  
369 gastric mesenchyme development (Faure *et al.*, 2015). We therefore analyzed the impact of  
370 added ENCCs on the development of the small amount of endogenous mesenchyme present in

371 hAGOs. Addition of ENCCs at day 6 of hAGO development had little effect on the number of  
372 FOXF1+ mesenchyme cells; in contrast, addition of ENCCs at day 9 resulted in 2-4 times more  
373 FOXF1+ mesenchyme surrounding the epithelium (Figure 5A-D). Addition of ENCCs at day 6 or  
374 day 9 also correlated with increased levels of gastric mesenchymal genes *BARX1*, *BAPX1*,  
375 *FGF10*, *ISL1*, and *SIX2* (Figure 5E) (Faure *et al.*, 2013). This suggested that the enteric  
376 neurons not only encourage the growth of mesenchyme *in vitro*, but also support its proper  
377 regional patterning into gastric-specific mesenchyme. It is interesting that addition of ENCCs at  
378 day 9 promotes the expansion of mesenchyme whereas addition at day 6 does not. The main  
379 difference is that ENCCs recombined with hAGOs at day 6 are exposed to the BMP inhibitor  
380 NOG and RA from day 6-9 as part of the normal hAGO protocol. The impact of this treatment on  
381 ENCCs will be discussed below.

382

### 383 **ENCC cells support the growth and morphogenesis of organoid epithelium *in vivo***

384 We described above (Figure 2) that addition of exogenous mesenchyme alone was not  
385 sufficient to promote growth and morphogenesis of organoid epithelium. However, we did not  
386 investigate how the addition of ENCCs alone without exogenous mesenchyme might impact  
387 epithelial development. Therefore, hAGOs with ENCCs recombined at day 6 and 9 were  
388 transplanted into mice and grown for 6-15 weeks at which time they were scored for graft  
389 survival, overall growth, and epithelial morphogenesis (Figure S5A-B). The presence of an ENS,  
390 even in the absence of exogenous mesenchyme, improved both number and epithelial growth  
391 of hAGO +ENCC grafts (Figures 6A-B and S5B-D). In most cases the epithelium of the grafts  
392 was a simple gastric epithelium with gastric hormonal cells, such as gastrin, ghrelin,  
393 somatostatin, and serotonin, as well as surface mucous cells marked by MUC5AC (Figure S5E).  
394 However, in 5/21 hAGO +ENCC grafts we observed pronounced glandular epithelial  
395 morphogenesis as compared to 0/19 hAGO -ENCC grafts (Figure 6A-B). A time course analysis  
396 of grafts 4, 10, and 14 weeks following transplantation showed rare examples of differentiated



397 smooth muscle (Figure S5F) and neuroglial cells expressing TUJ1, S100b, peripherin, nNOS,  
398 and GFAP (Figure S6A-B). GFAP cells represent approximately 1% of the total cells present  
399 within 14 week *in vivo* hAGOs +ENCC (Figure S6C). These neurons are arranged near the  
400 epithelium (Figure S6D and Movie S3) and capable of effluxing calcium as measured using a  
401 GCaMP reporter as previously shown (Figure S6E-F and Movie S4) (Workman *et al.*, 2017;  
402 Chen *et al.*, 2013). Together, these data indicate that ENCCs promote survival and engraftment  
403 of hAGOs and the development of glandular tissue in subset of grafts. However, without a  
404 sufficient amount of mesenchyme, addition of ENCCs alone will not result in the development of  
405 normal gastric tissue.

406

407 **The epithelium of hAGOs +ENCCs is morphologically and molecularly similar to**  
408 **Brunner's Glands.**

409 A number of hAGO +ENCC grafts displayed a complex glandular epithelial morphology  
410 (Figures 6A-B and S7C-D), expressed PDX1 and GATA4 indicative of gastrointestinal regional  
411 identity, and had hormone-expressing cells such as serotonin, ghrelin, histamine, and  
412 somatostatin (Figure 7A, data not shown). However, they did not express key gastric-specific  
413 epithelial markers CLDN18 or SOX2 (Figure 7A-B) or have characteristic gastric cell types  
414 MUC5AC-expressing mucous cells (Figure 7D). The glandular epithelium was also negative for  
415 intestinal epithelial markers CDX2 and CDH17 (Figure 7A-B). Lastly, we confirmed that these  
416 were human tissue and not a contaminant mouse tissues from the host (data not shown). Given  
417 that the glandular epithelium of the grafts was neither gastric nor intestinal, we explored the  
418 possibility that these were Brunner's glands. Brunner's glands are glandular structures found  
419 within the submucosa of the proximal part of the duodenum, near the pyloric junction. They  
420 serve to secrete sodium bicarbonate to neutralize any escaping gastric acids. Given the lack of  
421 definitive markers for human Brunner's glands, we established a combinatorial marker profile for  
422 Brunner's glands using patient biopsies (Figure S7A-B) and published reports (Figure 7C).

423 Human Brunner's glands are negative for gastric markers CLDN18, SOX2, and MUC5AC and  
424 intestinal markers CDH17, MUC2 and have low levels of CDX2 compared to adjacent duodenal  
425 epithelium (Figure S7). Human Brunner's glands are positive for glucagon-like peptide-1  
426 receptor (GLP-1R) and MUC6 and co-expression of these markers occurs only in Brunner's  
427 glands. The combinatorial expression profile of 9 different markers supports the conclusion that  
428 the glandular epithelium of hAGO +ENCC grafts is most similar to Brunner's glands (Figures 7C  
429 and S7A-B) (Tan *et al.*, 2020; Wang *et al.*, 2015; Balbinot *et al.*, 2017).

430         This shift in hAGO epithelium from gastric identity to the more posterior Brunner's gland  
431 identity suggest that the added ENCCs were driving this more posterior fate, suggesting that  
432 ENCCs, in the absence of mesodermal contribution, may produce a factor(s) that posteriorize  
433 gastric epithelium. One candidate pathway was BMP signaling, which is known to promote  
434 posterior fate in the gastrointestinal junction (Smith and Tabin, 1999; Smith *et al.*, 2000; Faure  
435 *et al.*, 2002; Tiso *et al.*, 2002; De Santa Barbara *et al.*, 2005; Theodosiou and Tabin, 2005;  
436 Davenport *et al.*, 2016; Stevens *et al.*, 2017). Analysis of ENCCs show high levels of expression  
437 of both *BMP4* and *BMP7* (Figure S8A). To functionally investigate if BMP activity might mediate  
438 the ability of ENCCs to promote a Brunner's gland fate, ENCCs were recombined with hAGO at  
439 day 6 and then organoids were cultured with the BMP inhibitor NOG from day 6-9, along with  
440 RA, which is a component of the normal hAGO protocol. None of the grafts (0/27) had  
441 Brunner's gland epithelium following 3 days of noggin treatment as compared to hAGOs  
442 +ENCCs grafts that were not treated with NOG, where the 5/21 grafts contained Brunner's  
443 gland epithelium. To investigate if NOG-treated ENCCs might have reduced posteriorizing  
444 activity we treated ENCC cultures with NOG and found significantly reduced levels of both  
445 *BMP4* and *7* (Figure S7B). We conclude that posteriorizing factors like *BMP4* and *7* are  
446 produced by ENCCs and that in the presence of BMP inhibitors, ENCC lose their ability to  
447 posteriorize gastric epithelium.

448

449 **DISCUSSION**

450 By understanding and applying the key signaling pathways known to regulate the  
451 development of different cell types, many protocols have now been published to direct the  
452 differentiation of hPSCs into germ layer-specific fates, including endoderm-derived epithelial  
453 cells, mesoderm-derived mesenchymal cells, and ectoderm-derived neural cells. This research  
454 extended those principles to also apply the known spatiotemporal events for GI organ assembly  
455 to tissue engineering, starting from separately derived germ layer derivatives. From studies of  
456 embryo development, we know that the GI tract is assembled in a step wise manner. First a  
457 two-dimensional sheet of endoderm forms a gut tube that becomes encapsulated by splanchnic  
458 mesenchyme that is then invaded by ENCCs that have migrated from the neural tube. This all  
459 happens within a few days during embryonic development. We mimic this by instructing a 2D  
460 sheet of endoderm to undergo morphogenesis forming gut tube-like spheroids, and then  
461 physically surrounding them with a cellular mixture of SM and ENCCs. To our knowledge, this  
462 co-culture of three unique cell types that grew together to form three germ layer organoids is the  
463 best hPSCs-derived approximation of bona fide human stomach tissues. The basic concept of  
464 assembling organoids from separately-derived germ layer progenitors was also applied to both  
465 fundus and esophagus, suggesting that this technology could be broadly applied to tissue  
466 engineer other organs, like lung, liver, and bladder.

467 Congenital diseases in humans often affects several organs and can be due to impacts  
468 on multiple germ layers. These three germ layer organoids represent new model systems to  
469 study both the effects of patient-specific mutations on multiple organs and how gene mutations  
470 impact individual germ layers, similar to a cell specific Cre approaches in mice. This approach  
471 has been used to study the impact of patient mutations on human PSC-derived ENCCs  
472 (Workman *et al.*, 2017), on PSC-derived epithelial cell types (Zhang *et al.*, 2019), and could be  
473 used to study mutations that largely effect mesenchyme (Gilbert *et al.*, 2020). Analyses of  
474 organoids could be used to identify previously unappreciated patient pathologies that could

475 inform improved clinical care. However, to effectively understand congenital disorders, we need  
476 to better understand the processes of epithelial-mesenchyme-ENS communication during  
477 normal organ development. The tractability of this system seems ideally suited to interrogate  
478 such signaling pathways mediating this crosstalk. Our data suggests that ENCCs impact the  
479 growth and patterning of endogenous mesenchyme. Moreover, without addition of exogenous  
480 splanchnic mesenchyme, ENCCs re-pattern gastric epithelium to a more posterior identity  
481 similar to Brunner's glands. However, when ENCCs are added simultaneously with a robust  
482 population of mesenchyme, together these germ layers maintain gastric patterning and promote  
483 gastric gland morphogenesis.

484         The ability to manipulate signaling pathways at will and in a germ layer-specific manner  
485 *in vitro* is a powerful way to dissect the molecular basis of organ development. For example, it is  
486 known that the WNT and BMP signaling pathways control the anterior-posterior and dorso-  
487 ventral patterning of the developing GI tract in model organisms (Smith and Tabin, 1999; Smith  
488 *et al.*, 2000; Faure *et al.*, 2002; Tiso *et al.*, 2002; De Santa Barbara *et al.*, 2005; Theodosiou and  
489 Tabin, 2005; Davenport *et al.*, 2016; Stevens *et al.*, 2017) and in hPSC-derived colonic  
490 organoids (Munera and Wells, 2017; Múnera *et al.*, 2017). In the gastro-duodenal boundary,  
491 WNT-mediated crosstalk between the epithelium and mesenchyme are essential for  
492 establishing and maintaining a molecular boundary between the gastric and duodenal  
493 epithelium (McCracken *et al.*, 2017; Kim *et al.*, 2005). Evidence from chick studies show that  
494 ENCCs regulate the anterior-posterior patterning of stomach (Faure *et al.*, 2015), and our data  
495 now show that ENCCs express BMP ligands, can posteriorize human gastric epithelium, and  
496 that inhibiting BMP signaling prevents the posteriorizing effects of ENCCs.

497         One striking feature of posteriorized gastric organoids is their ability to form Brunner's  
498 gland-like structures following transplantation and growth *in vivo*. Little is known about the  
499 embryonic development of these glands in any species, nor what markers define them.  
500 Brunner's glands normally form in the proximal duodenum close to the pyloric sphincter and lie

501 just below epithelium. We identified a marker profile of human Brunner's glands; no expression  
502 of the gastric markers SOX2, CLD18, MUC5AC, no expression of the duodenal markers  
503 CDH17, low expression of CDX2, and positive expression for the gastric mucin MUC5AC and  
504 the duodenal marker GLP-1R. Gastric organoids that are mispatterned by ENCCs form a  
505 glandular epithelium with a marker profile consistent with Brunner's glands. Human PSC-  
506 derived Brunner's gland organoids are a new model system to study development of this  
507 glandular system and identify the role of ENCCs in patterning the gastro-duodenal region.

508         Our findings highlight that the only context in which we see formation of normal gastric  
509 tissue is when foregut spheroids are combined with a carefully controlled amount of SM and  
510 ENCCs. Adding SM alone results in organoids with poorly organized smooth muscle and a  
511 simple epithelium and adding ENCCs along results in mispatterned epithelium and the formation  
512 of Brunner's glands. However, recombining robust populations of SM and ENCCs results in  
513 well-organized smooth muscle, an organized neuroglial plexus, and the formation of properly  
514 patterned gastric glands with chief and parietal cells. Moreover, the neuroglial plexus forms a  
515 functional link with the smooth muscle to regulate rhythmic gastric contractions. We conclude  
516 that communication between all three germ layers is essential for proper assembly and  
517 morphogenesis of stomach tissue.

518         A possible mechanism to explain why gastric gland morphogenesis requires both ENS  
519 and mesenchyme comes from studies of intestinal and lung development. In the intestine of  
520 mice and chicks, mesenchymal clusters (Freddo *et al.*, 2016; Walton *et al.*, 2012) and smooth  
521 muscle (Shyer *et al.*, 2013) regulate villus morphogenesis and lung branches (Goodwin *et al.*,  
522 2019). Additional studies in chick showed how BMP signaling from both the epithelium and  
523 neural cells regulates the radial position of developing smooth muscle layers (Huycke *et al.*,  
524 2019). It follows then that innervation of smooth muscle layers in the human gastric antrum may  
525 promote development of organized smooth muscle and glandular morphogenesis. Our data  
526 suggest that ENCCs require a robust population of mesenchyme to promote gastric gland

527 morphogenesis. However, addition of ENCCs alone promotes formation of Brunner's gland-like  
528 epithelium in some transplants suggesting that the addition of mesenchyme is important both to  
529 maintain gastric identity and/or synergize with the signals coming from the ENCCs. This seems  
530 even more plausible when one considers the close proximity and physical connection of enteric  
531 nerves with both the smooth muscle and the epithelial cells within stomach glands, both of  
532 which are necessary for proper stomach function. In the case of submandibular gland in mouse  
533 signals from the ENS maintains the epithelial progenitor pools and supports branching  
534 morphogenesis *in vitro* (Knox *et al.*, 2010) and *in vivo* (Nedvetsky *et al.*, 2014).

535 Little is known about ENS development and the specifics of neuronal diversity within  
536 proximal GI tract, relative to the intestine and colon ENS (Kaelberer *et al.*, 2018; Lasrado *et al.*,  
537 2017; Rakhilin *et al.*, 2016; Bohorquez *et al.*, 2015; Walsh and Zemper, 2019; Nagy and  
538 Goldstein, 2017; Brookes *et al.*, 2013). We have observed differences in ENS development  
539 between human gastric and intestinal organoids. For example, in intestinal organoids we did not  
540 observe ENCC differentiation into nNOS neurons *in vitro* (Workman *et al.*, 2017) whereas these  
541 neurons did form in gastric organoids. This suggests that regional differences in ENS  
542 development between proximal and distal GI organs could be studied using these human  
543 organoid systems. There are many differences in stomach and intestinal development, from  
544 orientation and innervation of smooth muscle to glandular morphogenesis and neuronal control  
545 of secretion that might be modeled in these systems. Moreover, human organoids are now  
546 being used to study human organ physiology. For example, hPSC-derived human intestinal  
547 organoids were used as a model of malabsorption in humans and led to the discovery of a new  
548 mechanism by which enteroendocrine cells control nutrient absorption (McCauley *et al.*, 2020).

549 In summary, we have generated three germ layer organoids that are morphologically,  
550 cellularly, and functionally similar to human stomach tissues. Engineered gastric tissue has  
551 glands with surface and pit mucous cells, as well as chief and parietal cells. We observed  
552 oriented layers of smooth muscle that were innervated by functional enteric nerves. We have

553 used this highly manipulable system to begin to define cellular communications that happen  
554 during development of the human stomach and expect that it we be equally powerful as a model  
555 of gastric diseases. Given that this technology is broadly translatable to other organs, it is  
556 possible that engineered tissue might be a source of material for reconstruction of congenital  
557 disorders and acute injuries of the upper GI tract.

558 **LIMITATIONS OF THE STUDY**

559 hPSC-derived gastric organoids can be variable between differentiations. Coordinating the  
560 timing of recombination of three simultaneously generated germ layers, as well as the  
561 requirement of kidney capsule transplantation into immunocompromised mice necessary to  
562 promote three germ layer organoid maturity is technically challenging, lengthy, and can limit  
563 protocol scalability.

564

565 **ACKNOWLEDGEMENTS**

566 We would like to thank all the members of the Wells, Zorn, and Helmrath laboratories for  
567 reagents and feedback. We specifically thank Heather McCauley, Jacob Enriquez, and J.  
568 Guillermo Sanchez from the Wells lab for technical assistance with ectopic transplantation  
569 surgeries and harvests. We also thank Chris Mayhew and Amy Pitstick from the Pluripotent  
570 Stem Cell Facility as well as Matt Kofron and Evan Meyer from the Confocal Imaging Core at  
571 Cincinnati Children's Hospital for constant support and guidance. Finally, we thank Mansa  
572 Krishnamurthy, a pediatric fellow in the Wells Lab, for the human antrum and duodenum  
573 samples used for Brunner's Gland characterization. This research was supported by the grants  
574 from the NIH, U18 EB021780 (JMW, MAH), U19 AI116491 (JMW), P01 HD093363 (JMW), UG3  
575 DK119982 (JMW), U01 DK103117 (MAH), 1F31DK118823-01 (AKE), NIEHS 5T32-ES007250-  
576 29 (DOK), the Shipley Foundation (JMW), and the Allen Foundation (JMW). We also received  
577 support from the Digestive Disease Research Center (P30 DK078392).

578

579 **AUTHOR CONTRIBUTIONS**

580 AKE and JMW primarily conceived of the experimental design, analyzed the experiments, and  
581 co-wrote the manuscript. AKE, DOK, HMB, NS, HMP, LEH, JGS, KK, and MK performed  
582 experiments. Specifically, AKE, DOK and HMB advised and performed the organoid  
583 recombination experiments. NS, AKE, HMB, JGS performed the ectopic kidney transplantation  
584 surgeries and harvests. HMP performed all organ bath experiments. AKE, DOK, and HMB  
585 conducted the protein and RNA analysis with LEH greatly serving as technical assistance. LH,  
586 JMW, and AMZ conceived of and developed the protocols to direct the differentiation of human  
587 PSCs into splanchnic mesenchyme. All authors contributed to the writing and/or editing of the  
588 manuscript.

589

590 **DECLARATION OF INTERESTS**

591 No competing interests declared related to this work.



592 **LEGENDS**

593

594 **Figure 1.** Incorporation of hPSC-derived splanchnic mesenchyme into hAGOs. **(A)** Schematic  
595 depicting the method of deriving and incorporating GFP+ splanchnic mesenchyme (SM) into  
596 hAGOs. SM was derived from an hPSC line that constitutively expresses GFP. **(B)**  
597 Representative immunostaining of day 4 splanchnic (left) and cardiac (right) mesenchymal  
598 monolayers costained with FOXF1 (green) and ISL1 (red). **(C)** Quantification of FOXF1+ (left)  
599 and ISL1+ (right) cells within day 4 splanchnic (green bar) and cardiac (red bar) mesenchymal  
600 monolayers (n=3 fields from one differentiation, \*p<0.05, Student's t-test). **(D)** Brightfield images  
601 of hAGOs grown for four weeks *in vitro* with and without recombination with exogenous GFP-  
602 labeled SM (green) costained with mesenchymal marker FOXF1 (red). Higher magnification  
603 images are shown to the right. **(E)** Quantification of FOXF1+ mesenchymal contribution (n=11-  
604 18 fields from at least 3 organoids per condition from one differentiation, same trend seen  
605 across at least two individually seeded differentiations, \*\*\*p<0.001, Student's t-test). **(F)** Select  
606 images of four week *in vitro* hAGOs with and without recombined SM (green) stained with  
607 smooth muscle marker  $\alpha$ SMA (red) and gastric epithelial markers CLDN18 (white).  
608

609

610 **Figure 2.** Three germ layer recombinants form human gastric tissue with innervated layers of  
611 smooth muscle and glandular epithelium. **(A)** Schematic depicting the generation of three germ  
612 layer recombinants using foregut endoderm, SM and ENCCs. **(B)** Morphological comparison  
613 between hAGO transplants with and without SM and ENCCs (top) and representative images of  
614 10 week *in vivo* hAGOs stained with  $\alpha$ SMA mesenchyme (red) (bottom). ENS is labeled with  
615 GFP (green) and counterstained with epithelial marker ECAD (white). **(C)** Marker analysis of  
616 gastric epithelial patterning and cell types that develop in three germ layer transplanted hAGOs.  
617 MUC5AC (red, top left) and MUC6 (red, top middle) mark surface pit and gland mucous cells,  
618 respectively. Endocrine cells were identified with the hormones ghrelin (red, top right), serotonin  
619 (red, bottom left), histamine (red, bottom middle), and gastrin (red, right bottom). GFP labels the  
620 recombined ENS (green) and the epithelium is labeled with CLDN18 (white, top) and ECAD  
621 (white, bottom). **(D)** Marker analysis of neuronal differentiation in three germ layer transplanted  
622 hAGOs. GFP positive ENS (green) is costained with choline acetyltransferase (CHAT, red, left)  
623 and tyrosine hydroxylase (TH, red, right). **(E)** Quantification of distance ( $\mu$ m) between epithelium  
624 of three germ layer transplanted hAGO and acetyltransferase (CHAT, left) and tyrosine  
625 hydroxylase (TH, right) neuronal subtypes (n=10-13 individual cells from two fields from one  
626 differentiation). See also Table S1 and Movie S1.

627

628 **Figure 3.** A comparison of engineered antral and fundic organoid tissue with the human  
629 stomach. Histological and immunofluorescence analysis of whole thickness gastric tissue from  
630 38wk **(A)** and adult **(B)** human stomach taken from the distal fundus and three germ layer  
631 transplanted **(C)** hAGO and **(D)** hFGO. The three germ layers are labeled with neuronal marker  
632 TUJ1 or GFP (green), smooth muscle  $\alpha$ SMA (red), and epithelial marker ECAD (white). **(E)**  
633 Representative images of gastric epithelial patterning and cell differentiation of three germ layer  
634 transplanted hAGOs (top) and hFGOs (bottom). PDX1 (green, left), endocrine cells expressing  
635 gastrin (GAST, green, middle), and the surface mucin (MUC5AC, green, middle) are **(E)**  
636 qualitatively and **(F-H)** qualitatively enriched in hAGOs and human antral biopsies. Parietal cells  
637 (ATP4B, red, left; and GIF, red, middle) and chief cells expressing fundic-specific pepsinogen A3  
638 (PGA3, red, right) are **(E)** qualitatively and **(I-J)** quantitatively enriched in the hFGOs and human  
639 fundic biopsies. Endocrine cells expressing ghrelin (GHRL, red, middle) and chief cell marker  
640 pepsinogen C (PGC, green, right) are observed at relatively similar levels in both thAGOs and  
641 thFGOs **(E,K)**. **(L)** Representative images of parietal cells in three germ layer transplanted  
642 hAGOs (top) and hFGOs (bottom) with colocalized apical expression of ATP4A (green) and  
ATP4B (red) H+/K+ ATPase subunits. **(E, L, M)** Epithelium is labeled with ECAD (white).

643 Significance denoted as \* $p < 0.05$ , \*\* $p < 0.01$ , and \*\*\* $p < 0.001$  determined by (F) Student t-test or  
644 (G-K) one-way ANOVA with Tukey's Multiple Comparison ( $n = 3-20$  fields from 5 thAGO TXPs  
645 from two differentiations, 8-14 fields from 2 thFGO TXPs from one differentiation, 5-6 fields from  
646 fetal stomach from 1 patient, 1-20 fields from adult fundus from 3 patients, and 4-10 fields from  
647 adult antrum from 2 patients). (M) Representative human adult antral biopsy labeled with  
648 MUC5AC (green) and ATP4B (red). See also Figures S2 and S3. **Figure 4.** Antral three germ  
649 layer organoids have a functional ENS that regulates gastric tissue contractions. (A) Isometric  
650 force contractions in tissues isolated from one individual transplanted hAGO +SM (blue) and  
651 three individual transplanted hAGO +SM +ECC (red) after an equilibrium period. Contractile  
652 activity was triggered using electrical field stimulation (EFS). (B) Neuronal (GFP, green, top; and  
653 TUJ1, green, bottom) and interstitial cells of Cajal (ICC) (c-KIT, yellow, top; and red, bottom)  
654 stained in 13 week *in vivo* hAGO +SM +ENCC grafts. (C) Quantification of the average number  
655 of ICCs in *in vivo* hAGO +SM +ENCC grafts ( $n = 7$  fields from 3 organoids from 2  
656 differentiations). (D) Activation of muscarinic receptors induced contractions in tissues isolated  
657 from a transplanted hAGO +SM (blue) and hAGO +SM +ECC (red). Increasing doses of  
658 bethanechol were added to the tissues at times indicated by the colored arrows. (E) Inhibition of  
659 the muscarinic receptor with scopolamine induced muscle relaxation. Calculated maximal and  
660 minimal tissue tension of tissues from hAGO +SM (blue) and hAGO +SM +ECC (red). (F)  
661 Representative tracings of contractile activity in response to electrical field stimulation (EFS) in  
662 transplanted hAGO +SM (blue) and hAGO +SM +ENCC (red). Dashed line indicates timing of  
663 EFS application and gray rectangles highlight pre-EFS contractile amplitude. (G) Inhibition of  
664 ENS activation with the neurotoxin tetrodotoxin (TTX) abrogates EFS-mediated contractions.  
665 Change in area under the curve following a control EFS stimulation measured for one minute  
666 after stimulation, followed by TTX treatment, and a final EFS stimulation in hAGO +SM +ENCC.  
667 (H) Functionally testing the role of nitrenergic and cholinergic neuronal activity in smooth muscle  
668 contractions. Change in area under the curve induced by EFS stimulation and following  
669 treatment with the nitrenergic inhibitor L-NAME and the cholinergic inhibitor Atropine. All data was  
670 normalized to tissue mass;  $n = 1$  hAGO +SM;  $n = 3$  hAGO +SM +ENCC from two differentiations.  
671

672 **Figure 5.** ENS cells promote *in vitro* growth and patterning of gastric mesenchyme. (A)  
673 Schematic illustrating the method of recombining hAGOs with ENCCs at day 6 and day 9 of  
674 hAGO protocol. (B) Representative images of four week *in vitro* hAGOs with (bottom) and  
675 without (top) ENS recombined on day 6 of hAGO protocol stained with TUJ1 neurons (green)  
676 and FOXF1 mesenchyme (red) and epithelial ECAD (white). Higher magnification images are  
677 shown to the right. (C) Representative images of four week *in vitro* hAGOs with (bottom) and  
678 without (top) ENS recombined on either day 6 (left) or day 9 (right) of hAGO protocol,  
679 demonstrate an increase in FOXF1+ mesenchyme (red). (D) Quantification of FOXF1+  
680 mesenchymal contribution ( $n = 16-24$  fields from at least 3 organoids from one differentiation,  
681 same trend seen across at least two individually seeded differentiations, \* $p < 0.05$ , \*\*\* $p < 0.001$ ,  
682 Student's t-test). (E) Relative expression of key gastric mesenchymal genes (*BARX1*, *BAPX1*,  
683 *FGF10*, *ISL1*, *SIX2*) in hAGOs +ENCC when compared to hAGOs -ENS. ( $n = 4-12$  wells, with a  
684 minimum of 3 organoids per well, from 5 individual differentiations, \* $p < 0.05$ , Student's t-test).  
685 See also Figure S3, Movie S2, and Table S1.  
686

687 **Figure 6.** ENCCs promote hAGO engraftment and epithelial growth. (A) Representative low  
688 magnification images of gross organoids of ECAD+ epithelium (white) from transplanted hAGOs  
689 with and without ENS following recombination at day 6 or day 9. (B) Quantification of organoid  
690 engraftment and epithelial growth from transplanted hAGOs with and without ENCCs. 24%  
691 (5/21) of hAGO +ENCC recombined at day 9 had complex glandular epithelium. See also  
692 Figures S5 and S6 and Movies S3 and S4.  
693

694 **Figure 7.** Identification of hAGO +ENCC glandular epithelium as Brunner's Glands. **(A)**  
695 Glandular epithelium expressed the pan gastrointestinal markers PDX1 (green) and GATA4  
696 (red) but did not express gastric epithelial marker CLDN18 or intestinal epithelial marker CDH17  
697 in transplanted hAGOs recombined with ENCCs on day 9. **(B-D)** Marker analysis of organoid  
698 epithelium at different time points following transplantation. **(B)** After 6 weeks growth *in vivo*  
699 hAGOs with ENCCs recombined at day 6 had a simple epithelium expressing the gastric  
700 markers SOX2 (green, inset) and CLDN18 (white) but not the intestinal marker CDX2 (red). The  
701 glandular epithelium of from day 9 recombinants did not express these gastric or intestinal  
702 markers. **(C)** Comparison of antral and duodenal markers to known markers of Brunner's glands  
703 and how these align with observed protein expression profile of complex epithelial growths from  
704 hAGOs +ENCC day 9 recombined grafts. †determined from previously published data;  
705 \*determined experimentally on human tissue samples of Brunner's Glands (see Figure S7B) **(D)**  
706 At 11 week post-transplant, the glandular epithelium in organoids did express MUC6 (green,  
707 left) and GLP-1R (green, middle), similar to human Brunner's glands. The simple epithelium  
708 (yellow arrowhead) expressed MUC5AC (green, right) while complex epithelium (orange arrow)  
709 the glandular epithelium did not. See also Figures S7 and S8.

## 710 **STAR METHODS**

711

### 712 **Animals**

713 All mice used in kidney capsule transplantation experiments were housed in the animal facility  
714 at Cincinnati Children's Hospital Medical Center (CCHMC) in accordance with NIH Guidelines  
715 for the Care and Use of Laboratory animals. Animals were maintained on a 12 hour light-dark  
716 cycle with access to water and standard chow ad libitum. Healthy male and female immune-  
717 deficient NSG (*NOD.Cg-Prkdc<sup>scid</sup>Il2rg<sup>tm1Wjl</sup>/SzJ*) mice, aged between 8 and 16 weeks old, were  
718 used in all experiments. These mice were obtained from the Comprehensive Mouse and Cancer  
719 Core Facility. All experiments were performed with the approval of the Institutional Animal Care  
720 and Use Committee (IACUC) of CCHMC.

721

722 Timed matings of wildtype mice were used to generate e13.5 embryos for immunohistological  
723 analysis. The morning that the vaginal plug was observed was denoted as e0.5.

724

### 725 **Human Biopsy Tissue**

726 The use of human tissues was approved by an Institutional Review Board (IRB) at CCHMC  
727 (protocol number 2015-5056). Informed consent for the collection and use of tissues was  
728 obtained from all donors, parents, or legal guardians. Full-thickness fundic and antrum stomach  
729 tissue samples obtained from bariatric procedures came from the Helmrath Lab at CCHMC  
730 under IRB protocol number 2014-0427. Human surgical samples were collected from patients  
731 between the ages of 15 and 17, and included both males and females of Caucasian and African  
732 American backgrounds. Healthy human full-thickness stomach and duodenal tissue samples  
733 were obtained from the CCHMC Pathology Core.

734

### 735 **Human ESC/iPSC lines and maintenance**

736 Human embryonic stem cell (hESC) lines H1 (WA-01) and H9 (WA-09) were purchased from  
737 WiCell (NIH approval number NIHhESC-10-0043 and NIHhESC-10-0062). The H1 line is male  
738 and the H9 line is female. H9-GAPDH-GFP and H9-GAPDH-mCherry hESCs along with human  
739 induced pluripotent stem cell (iPSC) line 77.3-GFP were all generated and obtained from the  
740 CCHMC Pluripotent Stem Cell Facility (PSCF) and approved by the institutional review board  
741 (IRB) at CCHMC. Human iPSC line WTC11 AAVS1-CAG-GCaMP6f was obtained from Bruce  
742 Conklin's laboratory at UCSF. All hPSC lines were analyzed for pluripotency and the absence of  
743 karyotypic abnormalities and mycoplasma contamination by the CCHMC PSCF. Human iPSC  
744 line WTC11 was analyzed for karyotype by Cell Line Genetics.

745

746 All human hPSCs were maintained in an undifferentiated state as colonies in feeder-free  
747 conditions. They were plated on human-ES-cell-qualified Matrigel (BD Biosciences) and  
748 maintained at 37°C with 5% CO<sub>2</sub> with daily replacement of mTeSR1 media (STEMCELL  
749 Technologies). Cells were routinely passaged every 4 days with Dispase (STEMCELL  
750 Technologies) after a confluency of about 80-90% was reached.

751

752 Differentiations of the following lineages for construction of three-germ layers organoids are not  
753 dependent or variable based on starting hPSC line. Please see the Key Resource Table under  
754 Experimental Modes: Cell Lines for minimum number of differentiations performed using each  
755 cell line.

756

### 757 **Differentiation of hPSCS into splanchnic mesenchyme**

758 Partially confluent hPSCs colonies were dissociated into single cells using Accutase (Thermo  
759 Fisher Scientific), resuspended in mTesR1 with thiazovivin (1 μM, Tocris), and passaged 1:20  
760 onto new Geltrex-coated 24-well plates (Sigma Aldrich). The directed differentiation of hPSCs

761 into lateral plate mesoderm has been previously described (Han *et al.*, 2020; Loh *et al.*, 2016).  
762 Briefly, hPSCs were exposed to Activin A (30 ng/ml, Cell Guidance Systems), BMP4 (40 ng/ml,  
763 R&D Systems), CHIR99021 (CHIR, 6  $\mu$ M, ReproCell), FGF2 (20 ng/ml, ThermoFisher  
764 Scientific), and PIK90 (100 nM, EMD Millipore) for 24 hours. A basal media composed of  
765 Advanced DMEM/F12 (ThermoFisher Scientific) supplemented with B27 supplement (1X,  
766 ThermoFisher Scientific), N2 supplement (1X, ThermoFisher Scientific), HEPES (13 mM,  
767 ThermoFisher Scientific), L-Glutamine (2 mM ThermoFisher Scientific), and penicillin-  
768 streptomycin (1X, ThermoFisher Scientific) was used for this and all subsequent differentiation  
769 steps. Cells were then exposed to A8301 (1  $\mu$ M, Tocris), BMP4 (30 ng/ml), and C59 (1  $\mu$ M,  
770 Cellagen Technology) for 24 hours. For splanchnic mesoderm generation, cells were cultured in  
771 A8301 (1  $\mu$ M), BMP4 (30 ng/ml), C59 (1  $\mu$ M), FGF2 (20 ng/ml), and RA (2  $\mu$ M, Sigma-Aldrich)  
772 from Day 2 to Day 4. To further direct regional splanchnic mesoderm, RA (2  $\mu$ M), PMA (2  $\mu$ M,  
773 Tocris) was used for 2 days, and then RA (2  $\mu$ M), PMA (2  $\mu$ M), NOG (100 ng/ml, R&D Systems)  
774 was used at the last 1 day to promote esophageal/gastric mesenchyme fate. Medium was  
775 changed every day throughout protocol. Confluent cells were resuspended using an Accutase  
776 treatment (2–3 min) and immediately combined with hAGOs, hFGOs, and hEOs (see below for  
777 recombination procedure).

778

### 779 **Differentiation of hPSCS into ENCCs**

780 The generation of hPSC-derived ENCCs has been previously published (Bajpai *et al.*, 2010;  
781 Workman *et al.*, 2017). Briefly for ENCC generation, confluent hPSCs were treated with  
782 collagenase IV (500 U/ml, Gibco) in mTeSR1 for 60-90 mins to detach colonies. Cells were  
783 diluted and washed with DMEM/F-12 (Gibco) and then gently triturated and resuspended in  
784 neural induction media, 1:1 ratio of DMEM/F12-GlutaMAX (Gibco) and Neurobasal Medium  
785 (Gibco) with B27 supplement (0.5x, Gibco), N2 supplement (0.5x, Gibco), pen-strep (1x, Gibco),  
786 insulin (5  $\mu$ g/mL, Sigma-Aldrich), FGF2 (20 ng/mL, R&D Systems), and EGF (20 ng/mL, R&D  
787 Systems), on non-TC-treated petri dishes (6cm, Fisherbrand). Neural induction media was  
788 changed daily and all-trans RA (2  $\mu$ M) was added on days 4 and 5 for posteriorization. Day 6  
789 free-floating neurospheres were plated on human fibronectin (HFN, 3  $\mu$ g/cm<sup>2</sup>, Corning) and fed  
790 neural induction media without RA for 4 days. Migrated cells were collected using a 90 sec  
791 Accutase treatment and passaged onto HFN. Passaged cells were allowed to grow to  
792 confluency for an additional 4 days and fed neural induction media without RA every day.  
793 Confluent cells were then collected using a 2-3 min Accutase treatment and immediately  
794 combined with hAGOs, hFGOs, and hEOs (see below for recombination procedure).

795

### 796 **Differentiation of hPSCS into hAGOs, hFGOs, and hEOs**

797 We utilized slightly modified previously published protocols to generate hAGOs, hFGOs and  
798 hEOs (McCracken *et al.* 2014, 2017, Trisno *et al.*, 2018). For hAGO and hFGO generation,  
799 confluent hPSC cultures were treated with Accutase to resuspend as single cells in mTeSR1  
800 with ROCK inhibitor Y-27632 (10  $\mu$ M; Tocris) and plated onto a Matrigel-coated 24-well dish  
801 (Sigma Aldrich). To direct the differentiation into definitive endoderm (DE), the hPSCs were  
802 exposed to Activin A (100 ng/ml) and BMP4 (50 ng/ml) in RPMI 1640 media (Life Technologies).  
803 For the following two days, cells were exposed to only Activin A (100 ng/ml) in RPMI 1640  
804 media containing increasing concentrations (0.2% and 2.0%, respectfully) of defined fetal bovine  
805 serum (dFBS; HyClone). To then pattern DE into posterior foregut endoderm spheroids, cells  
806 were treated with FGF4 (500 ng/ml, R&D systems), NOG (200 ng/ml), and CHIR (2  $\mu$ M) for  
807 3 days, with media changed daily, in RPMI 1640 with 2% dFBS. RA (2  $\mu$ M) was added on the  
808 third day of FGF4/NOG/CHIR treatment.

809

### 810 **Recombination and additional spheroid patterning**

811 Single cell suspensions of mesenchymal cells and ENCCs were counted and added to foregut  
812 spheroids at an approximate ratio of 1,000 ENCCs and 2,500 mesenchyme cells per spheroid.  
813 Cell mixtures were mixed via gentle pipetting, centrifuged at 300g for 3-5 minutes, and  
814 embedded into 50  $\mu$ L of basement membrane Matrigel to allow three-dimensional *in vitro*  
815 culture. Organoids were fed with a base media of Advanced DMEM/F12 supplemented with B27  
816 supplement (1X), N2 supplement (1X), HEPES (13 mM), L-Glutamine (2 mM), penicillin-  
817 streptomycin (1X), and EGF (100 ng/mL). In addition to this base media, the first three days  
818 were supplemented with NOG (200 ng/mL) and RA (2  $\mu$ M). In addition to EGF, hFGOs were  
819 supplemented with CHIR (2  $\mu$ M) throughout the organoid outgrowth and also received a 48 hr.  
820 pulse of BMP4 (50 ng/mL) and PD0325901 (2  $\mu$ M, Stem Cell Technologies) 96 hours prior to  
821 collection for parietal cell differentiation *in vitro*. Media was replaced every 3-4 days. Two  
822 weeks following spheroid embedding in Matrigel, the organoids were collected and re-plated in  
823 fresh Matrigel at a dilution of  $\sim$ 1:12.

824

#### 825 ***In vivo* transplantation of hAGOs and hFGOs**

826 hAGO, hFGO, hAGO +ENCC, hAGO +SM, hAGO +SM +ENCC, and hFGO +SM +ENS were all  
827 ectopically transplanted into the kidney capsule of NSG mice as previously described (Watson  
828 *et al.*, 2014). Briefly, four week old hAGOs or hFGOs were removed from Matrigel and  
829 transplanted into the kidney subcapsular space. Engrafted organoids were harvested 6–15  
830 weeks after transplantation and analyzed for neuroglial, epithelial, and mesenchymal  
831 maturation.

832

#### 833 ***Ex vivo* muscle contraction and ENS function**

834 Muscle contraction was assayed as previously described (Poling *et al.*, 2018) and ENS function  
835 and motility were assayed as previously described with slight modifications (Workman *et al.*,  
836 2017). Briefly, strips of tissue approximately 2 x 6 mm in size were dissected and the epithelium  
837 mechanically removed in a method similar to seromuscular stripping as previously described  
838 (Workman *et al.*, 2017). No chelation buffer was used. Resulting strips of muscle from hAGO  
839 +SM +ENCC were mounted within an organ bath chamber system (Radnoti) to isometric force  
840 transducers (ADInstruments) and contractile activity continuously recorded using LabChart  
841 software (ADInstruments). After an equilibrium period, a logarithmic dose response to  
842 Carbamyl- $\beta$ -methylcholine chloride (Bethanechol; Sigma-Aldrich) was obtained through the  
843 administration of exponential doses with concentrations of 1 nM to 10 mM at 2 min intervals  
844 before the administration of 10  $\mu$ M scopolamine (Tocris Bioscience). Data are normalized to  
845 muscle strip mass. After another equilibrium period, muscle preparations were then stimulated  
846 with a control EFS pulse. NG-nitro-L-arginine methyl ester (L-NAME; 50  $\mu$ M; Sigma) was  
847 applied 10 min before EFS stimulation to observe the effects of NOS inhibition. Without  
848 washing, Atropine (atropine sulfate salt monohydrate; 1  $\mu$ M; Sigma) was the applied 10 min  
849 prior to a final EFS stimulation to observe the cumulative effect of NOS and Ach receptor  
850 inhibition. After several washes and an additional equilibrium period, another control EFS pulse  
851 was administered. Neurotoxin tetrodotoxin (TTX; 4  $\mu$ M; Tocris) was administered 5 min before a  
852 final EFS stimulation. Analysis was performed by calculating the integral (expressed as area  
853 under the curve, AUC) immediately before and after stimulation for 60s. Data are normalized to  
854 muscle strip mass.

855

#### 856 ***Ex vivo* GCaMP6f calcium imaging**

857 Detection of calcium transients was performed using the above-mentioned human iPSC line  
858 WTC11 AAVS1-CAG-GCaMP6f. Transplanted hAGOs +ENCC were harvested and then  
859 cultured on 8-well micro-slide (Ibidi) for 24 hours prior to imaging. They were then imaged every  
860 4-15 sec for 3-10 min using either a 10x or 20x objective on a Nikon Ti-E inverted A1 confocal

861 microscope with NIS elements software to obtain background fluorescence level. Transplanted  
862 hAGOs +ENCC were then treated with 30 mM KCl. Experiments were carried out at RT.

863

#### 864 **Tissue Processing, Immunohistochemistry, and Microscopy**

865 Cell monolayers, ENCCs, and day 0 spheroids were washed with 1x phosphate-buffered saline  
866 (PBS), fixed with 4% paraformaldehyde (PFA) at room temperature (RT) for 15 min, washed,  
867 and stored in PBS at 4°C. Four week old *in vitro* organoids and *in vivo* transplants were washed  
868 with PBS, fixed in 4% PFA at 4°C overnight, washed, and then placed in either PBS, 30%  
869 sucrose in PBS, or 70% ethanol at 4°C overnight for downstream whole mount, cryogenic, or  
870 paraffin processing, respectively. Prior to fixation, whole mount tissues were extracted from  
871 Matrigel using manual pipetting in cold PBS and Cell Recovery Solution (Corning). Tissues were  
872 then embedded in either O.C.T. Compound (Tissue-Tek) or paraffin and were serially sectioned  
873 at a thickness of 7-8  $\mu\text{m}$  onto Superfrost Plus glass slides (Fisherbrand). Cryosection slides and  
874 paraffin slides were stored at -80°C and RT, respectively. Routine Hematoxylin & Eosin (H&E)  
875 staining was performed by the Research Pathology Core at CCHMC.

876

877 Frozen slides were thawed to room temperature (RT) and rehydrated in PBS, while paraffin  
878 slides were deparaffinized, rehydrated, and subjected to heat- and pressure-induced antigen  
879 retrieval in citrate buffer (0.192% citric acid and 0.0005% Tween 20 in dH<sub>2</sub>O of pH 6.0 with  
880 NaOH) for 30 minutes and brought to RT on ice. All slides and cells were washed with PBS,  
881 permeabilized with 0.5% Triton X-100 in PBS (PBST) for 15 min at RT and then blocked with  
882 5% normal donkey serum (NDS, Jackson ImmunoResearch) in PBS for one hour at RT. Tissue  
883 was incubated at 4°C overnight in primary antibodies diluted in 5% NDS in PBS. Specific  
884 antibody details are listed in the Key Resource Table. The following day, tissue was washed  
885 and incubated with secondary antibodies at RT for one hour, thoroughly washed, and cover  
886 slipped with Fluoromount-G (Southern Biotech).

887

888 For wholemount staining, organoids were washed at RT and then permeabilized with PBST at  
889 4°C overnight. The next day, organoids were blocked in 5% NDS in PBST for 6-8 hours at RT  
890 and then incubated in primary antibodies at 4°C overnight on a rocking platform. Organoids  
891 were extensively washed in PBST and then incubated in secondary antibodies at 4°C overnight.  
892 Finally, organoids were washed with PBST, PBS and then serially dehydrated to 100%  
893 methanol. Organoids were then optically cleared with Murray's Clear (2:1 benzyl benzoate:  
894 benzyl alcohol, Sigma) for at least 15 minutes prior to imaging.

895

896 Brightfield and GFP fluorescence images of live tissue samples were captured using either a  
897 Leica DMC5400 or DFC310 FX camera attached to a stereomicroscope. Whole mount and all  
898 immunofluorescent images were captured using a Nikon Ti-E inverted A1 confocal microscope.  
899 Images were processed and quantified using Nikon NIS Elements, Bitplane Imaris, Adobe  
900 Illustrator, and Microsoft PowerPoint software.

901

#### 902 **RNA isolation and quantitative real-time PCR (qRT-PCR)**

903 Spheroids and organoids were harvested in RA1 Lysis Buffer and  $\beta$ -mercapethanol and stored  
904 at -80°C until total RNA was isolated using NucleoSpin RNA Isolation Kit (Macherey-Nagel)  
905 according to manufacturers' instructions. Complementary DNA (cDNA) was reverse transcribed  
906 from 116 ng of RNA using a SuperScript VILO cDNA Synthesis Kit (Invitrogen). qRT-PCR was  
907 performed using a QuantiTect SYBR Green PCR Kit (Qiagen) in MicroAmp EnduraPlate Optical  
908 96-Well Fast Reaction Plates (Applied Biosystems) and run on a QuantStudio 6 Real-Time PCR  
909 Detection System (Applied Biosystems). Primer sequences are listed in the Key Resource  
910 Table. Analysis was performed using the  $\Delta\Delta\text{Ct}$  method by first normalizing all cycle threshold

911 (Ct) values to a base housekeeping gene (*GAPDH*, *PPIA*, or *FOXF1*) and then to the control  
912 hAGO samples. Statistical analysis was performed using Student's *t*-test.

913

#### 914 **Statistical analyses**

915 For analysis of organoid patterning, “n” represents the number of replicates performed in each  
916 experiment and each replicate is defined as 1 well of approx. 3-5 organoids in Matrigel culture.  
917 Any analysis presented from one individual experiment is representative of trends seen across  
918 at least two individually seeded experiments. All data are represented as mean  $\pm$  s.d. Student's  
919 *t*-tests with 2-tailed distribution and un-equal variance was completed using Microsoft Excel,  
920 where  $p \leq 0.05$  is symbolized by \*,  $p \leq 0.01$  is symbolized by \*\*, and  $p \leq 0.001$  is symbolized by  
921 \*\*\*. The determined significance cutoff was  $p \leq 0.05$ . No statistical method was used to  
922 predetermine sample size. The investigators were not blinded to allocation during experiments  
923 and outcome assessment. No randomization was made.



924 **SUPPLEMENTAL INFORMATION**

925

926 **Figure S1.** Splanchnic mesenchymal recombination yielded the most added exogenous  
927 mesenchyme while still retaining endogenous mesenchyme, relating to Figure 1. (A) Brightfield  
928 images of 4 week *in vitro* hAGOs recombined with varying concentrations of splanchnic and  
929 septum transversum (STM) mesenchyme on day 6 of hAGO protocol. Visual qualitative  
930 assessment of 4 week *in vitro* hAGOs lead to utilizing splanchnic mesenchyme at a ratio of  
931 50,000 cells/well of approx. 20-30 hAGO spheroids. This equates to an approx. 2:1 ratio of  
932 splanchnic mesenchymal cells to hAGO epithelial cells. (B) Brightfield images of hAGOs grown  
933 for four weeks *in vitro* with and without recombination with exogenous GFP-labeled gastric-  
934 esophageal mesenchyme (GEM) (green) costained with mesenchymal marker FOXF1 (red).  
935 Higher magnification images are shown to the right. This relates to Fig. 1D. (C) Quantification of  
936 various mesenchymal recombination techniques, including day 6 mesenchymal recombination  
937 (left) of either GFP+ splanchnic (SM) or cardiac (CM) mesenchyme and day 9 mesenchymal  
938 recombination (right) of either GFP+ gastric/esophageal (GEM) or septum transversum (STM)  
939 mesenchyme (n=at least 6 fields from at least 3 organoids per condition from one differentiation,  
940 same trend seen across at least two individually seeded differentiations, \*\*p<0.01, Student's t-  
941 test).

942

943 **Figure S2.** Three germ layer *in vitro* and *in vivo* hAGOs and hFGOs contain GFP+ splanchnic  
944 mesenchyme and RFP+ ENS, relating to Figure 3. (A) Brightfield and fluorescent images of four  
945 week *in vitro* hAGO +GFP SM (green +RFP ENS (red) and epithelial ECAD (white). Higher  
946 magnification images are show on the bottom row. (B) Quantification of GFP+ mesenchyme,  
947 RFP+ neural, and ECAD+ epithelial populations within four week *in vitro* hAGOs (n=8 fields  
948 from at least 3 organoids from one differentiation, same trend seen across at least two  
949 individually seeded differentiations). (C) Representative images of gross *in vitro* and post  
950 transplantation hAGOs with and without incorporation of SM and GFP-labeled ENS. GFP  
951 neurons formed networks around grafts post transplantations. (D) Quantification of  
952 mesenchymal populations within four week *in vitro* hAGOs (n=11-18 fields from at least 3  
953 organoids from one differentiation, same trend seen across at least two individually seeded  
954 differentiations, \*\*\*p<0.001, Student's t-test). (E) Representative images and (F) quantification  
955 of the epithelial (1), proximal muscularis mucosa (2), submucosa (3), and distal muscularis  
956 externa (4) layer thickness from hAGOs 12 weeks post transplantation, 38 week old human fetal  
957 stomach, and adult stomach (n=3-9 fields from 3 hAGOs, 1 38wk fetal stomach, and 1 adult  
958 stomach). (G) Representative images of gross *in vitro* and post transplantation hFGOs with and  
959 without incorporation of SM and GFP-labeled ENS. GFP neurons formed networks around  
960 grafts post transplantations (H) Representative histological (left) and immunofluorescent (middle  
961 and right) comparison of *in vitro* hFGOs with and without added SM and GFP ENS as well as  
962 with and without added BMP4 and MEK pathway inhibitor PD03 to stimulate parietal cell  
963 differentiation. Neurons are labeled with TUJ1 (green, middle), smooth muscle with  $\alpha$ SMA (red,  
964 middle), and parietal cells with APT4A (green, right) and ATP4B (red, right). Epithelium is  
965 labeled with ECAD (white). Inset (right) highlighting ATP4B+ parietal cell differentiation in  
966 hFGOs with added SM and ENS.

967 **Figure S3.** Constructing three germ layer organoids *in vitro* is applicable to human esophageal  
968 organoids, relating to Figure 3. (A) Brightfield and GFP-fluorescent images of 1 mo. *in vitro*  
969 HEOs. GFP cells label exogenous hPSC-derived SM. Immunofluorescent images of  
970 representative HEOs depicting GFP+ (green), FOXF1+ mesenchymal (red), and Vimentin+  
971 (VIM, red) mesenchymal cells. (B) Quantification of different mesenchymal populations within 1  
972 mo. *in vitro* HEOs. FOXF1+ expressing cells without GFP mark endogenous mesenchyme,  
973 while both GFP+ groups represent exogenous SM (n=16-18 fields from at least 3 organoids per  
974 condition from one differentiation, same trend seen across at least two individually seeded

975 differentiations, \*\* $p < 0.01$ , \*\*\* $p < 0.001$ , Student's t-test). (C) Brightfield images of 2 mo. *in vitro*  
976 HEOs +/- ENCC showing a visible expansion of additional cells within HEOs incorporated with  
977 ENS. (D) Immunofluorescent images of 1 mo. *in vitro* HEOs depicting TUJ1+ (green) enteric  
978 neurons surrounding the KRT5+ (red) and ECAD+ (white) epithelium of HEOs +ENCC. Higher  
979 magnification images are shown to the right. (E) Relative expression of neuronal-specific genes  
980 including tubulin genes, TUJ1 and MAP2, and filament genes, Nestin within 1 mo. HEOs  
981 +ENCC (n=3, representative of 3 individual experiments, \*\* $p < 0.01$ , \*\*\* $p < 0.001$ , Student's t-test).  
982 (F) Brightfield and fluorescent images of 1 mo. *in vitro* HEOs +GFP SM +RFP ENCC. Higher  
983 magnification images are show on the bottom row. ECAD marks the epithelium in white. (G)  
984 Quantification of GFP mesenchyme, RFP neural, and ECAD+ epithelial populations within 1 mo.  
985 *in vitro* HEOs (n=12 fields from at least 3 organoids from one differentiation, same trend seen  
986 across at least two individually seeded differentiations). (F) Human tissue sample of 38 week  
987 esophagus (H&E, top; TUJ1, green, bottom;  $\alpha$ SMA, red, bottom; ECAD, white; bottom; DAPI,  
988 blue; bottom). (I) Brightfield images of 1 mo. *in vitro* HEOs +/- SM +/- ENCC showing a visible  
989 expansion of additional cells within HEOs incorporated with ENS. Immunofluorescent images of  
990 1 mo. *in vitro* HEOs depicting TUJ1+ (green) enteric neurons and FOXF1+ (red) mesenchyme  
991 surrounding the KRT8+ (white) epithelium of HEOs +SM +ENS. Higher magnification images  
992 are shown to the right.

993  
994 **Figure S4.** hPSC-derived ENCCs differentiated into neuroglial subtypes when engineered into  
995 hAGOs without exogenous mesenchyme, relating to Figure 5. (A) Schematic depicting detailed  
996 method of deriving and innervating hAGOs. (B) Representative brightfield (left) and GFP  
997 fluorescent (right) images of four week *in vitro* hAGOs with and without GFP+ ENS. (C)  
998 Representative images of end time point, day 14, monolayer ENCCs stained for key ENCC  
999 markers SOX10 (green, left), AP2A (red, middle), and p75 (red, right). (D) Relative expression  
1000 of neural crest specifier genes (SOX9, SOX10, and SNAIL2), and (E) regional hox patterning  
1001 genes (HOXB3, HOXB5, HOXB7) (n=3 wells from one differentiation, same trend seen across  
1002 at least four individually seeded differentiations, \*\* $p < 0.01$ , Student's t-test). (F) Wholemout  
1003 immunofluorescence of four week *in vitro* hAGO +ENCC labeled with TUJ1+ neurons. (G)  
1004 Immunofluorescent images of TUJ1+ neurons (top) and S100b+ glial cells (bottom) co-  
1005 expressed with GFP labeled ENCCs. (H) Quantification of the neuroglial composition co-  
1006 expressing GFP (n=6 fields from one differentiation, same trend seen across at least two  
1007 individually seeded differentiations, \*\*\* $p < 0.001$ , Student's t-test). (I) Immunofluorescent images  
1008 of specific neuronal subtypes, including inhibitory neurons (nNOS) and synaptophysin (SYNAP),  
1009 dopaminergic neurons (TH), sensory neurons (CALB1), and glial fibrillary acidic protein (GFAP)  
1010 in hAGOs +ENCC. (J) Quantification of GFAP+ cells in four week *in vitro* hAGO +ENCC (n=11-  
1011 16 fields from at least 3 organoids from one differentiation, p-value determined using Student's  
1012 t-test). Representative images (K,M) and quantification (L,N) of (K,L) TUJ1+ neurons (red) and  
1013 (M,N) nNOS+ inhibitory neurons (green) within four week *in vitro* hAGOs +ENCC (top) and  
1014 e13.5 WT murine stomach (bottom) (n>2 fields from one differentiation and one mouse; there is  
1015 no significant difference). Epithelium is labelled with ECAD (white). Right panels are higher  
1016 magnification insets of left panels.

1017  
1018 **Figure S5.** ENS cells support *in vivo* growth and survival of hAGOs, relating to Figure 6. (A)  
1019 Schematic illustration the method of transplanting hAGOs +ENCC. (B) Quantification of  
1020 epithelial growth from transplanted hAGOs with and without ENS (n=46-48 transplants per  
1021 condition from 6 individual differentiations). (C) Representative brightfield (left) and GFP  
1022 fluorescent (right) images of transplanted hAGOs with and without GFP+ ENS following *in vivo*  
1023 transplantation (n=29). (D) Brightfield (left) and immunofluorescent (right) images of ECAD+  
1024 epithelium (white) from *in vivo* hAGOs with or without ENS cystic grafts. Representative images  
1025 of (E) differentiated antral epithelial and (F) mesenchymal and neuronal cell types in hAGOs

1026 +ENCC following *in vivo* growth. (E) Endocrine cells (yellow arrow) are marked with gastrin,  
1027 ghrelin, somatostatin, and serotonin, as well as surface mucous cells marked by MUC5AC. (F)  
1028 Mesenchymal cells are marked with FOXF1+ with smooth muscle marked with  $\alpha$ SMA. Lineage-  
1029 traced hPSC-derived ENCCs are marked by GFP and differentiated inhibitory neurons are  
1030 marked with nNOS. Sections were counterstained with epithelial marker ECAD (white) and  
1031 nuclear DAPI (blue).

1032  
1033 **Figure S6.** Transplanted hAGO grafts +ENS contain appropriate neuroglial cell types that are  
1034 able to efflux calcium, relating to Figure 6. (A) Immunofluorescent images of *in vivo* hAGOs  
1035 +ENCC show presence of TUJ1+ neural and S100b+ glial cells as well as differentiated  
1036 neuronal subtypes marked by peripherin and nNOS. ECAD (white) marks the epithelium. (B)  
1037 Immunofluorescent images of *in vivo* hAGOs +ENCC show presence of GFAP+ glial cells  
1038 (green). (C) Quantification of GFAP+ cells in 14 week *in vivo* hAGO +ENCC (n=10 fields from at  
1039 least 3 organoids from one differentiation). (D) Wholemout immunohistochemistry of *in vivo*  
1040 hAGO +ENCC show a 3D network formation of TUJ1+ neurons within  $\alpha$ SMA+ smooth muscle  
1041 layers. (E) Brightfield images of the *in vivo* hAGO +ENCC grafts used to obtain live images of  
1042 GCaMP neuronal firing. (F) GFP fluorescent static images taken from live-imaged movie  
1043 depicting firing of two individual neurons, indicated by a yellow arrow and orange arrowhead.  
1044

1045 **Figure S7.** Defining Brunner's gland epithelium using combinatorial marker expression analysis  
1046 of Human Brunner's Glands, relating to Figure 7. (A) H&E (left) and immunofluorescent (right)  
1047 images of adult human Brunner's glands labeled with intestinal epithelial marker CDH17 (white).  
1048 (B) Immunofluorescent comparison of adult human antrum (top) and duodenum and Brunner's  
1049 glands (bottom). The gastric epithelial cell types are labeled with CLDN18, SOX2, MUC5AC,  
1050 PGA3 (red), and PGC (green, right). Intestinal cell types are labeled with markers CDX2, and  
1051 MUC2 (green). Endocrine hormone GAST (green, middle left) was observed in all regions. Only  
1052 PGC and GAST (green) were consistently observed in Brunner's Glands. Epithelium was  
1053 labeled with ECAD or  $\beta$ -catenin (white).  
1054

1055 **Figure S8.** Brunner's Gland-like epithelium only developments from hAGOs innervated by  
1056 ENCCs untreated with Noggin and Retinoic Acid, relating to Figure 7. (A) Relative expression of  
1057 BMP ligands (*BMP4* and *BMP7*) at different points of ENCC differentiation. hPSCs and day 6  
1058 neurospheres (NSs) were used to compare to ENCCs. (B) Relative expression of BMP ligands  
1059 with and without NOG and RA treatment. (C) Representative images of organoids with ECAD+  
1060 epithelium (white) from transplanted hAGOs +ENCC following recombination at either day 6 or  
1061 day 9 of hAGO protocol. (D) Representative images of organoids with ECAD+ epithelium (white)  
1062 and human nuclei expression (green) from transplanted hAGOs +ENCC at day 9 of hAGO  
1063 protocol; higher magnification is shown to the right.  
1064

1065 **Movie S1.** 3-dimensional video image of wholemount immunofluorescence of 10 week *in vivo*  
1066 three germ layer hAGO +SM +GFP ENS (neurons-green,  $\alpha$ SMA-red, ECAD-white, DAPI-blue,  
1067 10x magnification). Video corresponds to Figure 2A, bottom right panel.  
1068

1069 **Movie S2.** 3-dimensional video image of wholemount immunofluorescence of 4 week *in vitro*  
1070 hAGO +GFP ENS demonstrates network morphology of TUJ1+ neurons (neurons-green, TUJ1-  
1071 red, ECAD-white, DAPI-blue, 10x magnification). Video corresponds to Figure S3C, relating to  
1072 Figure 5.  
1073

1074 **Movie S3.** 3-dimensional video image of wholemount immunofluorescence of 8 week *in vivo*  
1075 hAGO graft +GFP ENS demonstrates network morphology of TUJ1+ neurons (neurons-green,

1076 TUJ1-red, ECAD-white, DAPI-blue, 10x magnification). Video corresponds to Figure S5B,  
1077 relating to Figure 6.

1078

1079 **Movie S4.** Time-lapse video of live-imaged *in vivo* hAGO graft +ENS where ENS was derived  
1080 from ENCCs containing a GCaMP6f reporter. GFP fluorescent firing demonstrates Ca<sup>2+</sup> flux of  
1081 multiple individual neurons. hAGOs were generated with H1 cells, which do not have a Ca<sup>2+</sup>  
1082 indicator. Images were collected every 4 seconds for 3 minutes using a 20x objective. Video  
1083 corresponds to Figure S5D, relating to Figure 6.

1084

1085 **Table S1.** Additional brightfield images of *in vivo* hAGO grafts recombined with either  
1086 mesenchyme, ENCCs, neither, or both, relating to Figure 2.

1087

1088 **Table S2.** List of all neural markers assessed within *in vitro* and *in vivo* organoid cultures,  
1089 relating to Figure 5.

1090 **REFERENCES**

- 1091 Bajpai, R., Chen, D. A., Rada-Iglesias, A., Zhang, J., Xiong, Y., Helms, J., Chang, C. P., Zhao,  
1092 Y., Swigut, T. and Wysocka, J. (2010) 'CHD7 cooperates with PBAF to control multipotent  
1093 neural crest formation', *Nature*, 463(7283), pp. 958-62.
- 1094 Baker, C., Ahmed, M., Cheng, K., Arciero, E., Bhave, S., Ho, W. L. N., Goldstein, A. M. and  
1095 Hotta, R. (2020) 'Hypoganglionosis in the gastric antrum causes delayed gastric emptying',  
1096 *Neurogastroenterol Motil*, 32(5), pp. e13766.
- 1097 Balbinot, C., Vanier, M., Armant, O., Nair, A., Penichon, J., Soret, C., Martin, E., Saandi, T.,  
1098 Reimund, J. M., Deschamps, J., Beck, F., Domon-Dell, C., Gross, I., Duluc, I. and Freund, J. N.  
1099 (2017) 'Fine-tuning and autoregulation of the intestinal determinant and tumor suppressor  
1100 homeobox gene CDX2 by alternative splicing', *Cell Death Differ*, 24(12), pp. 2173-2186.
- 1101 Barber, K., Studer, L. and Fattahi, F. (2019) 'Derivation of enteric neuron lineages from human  
1102 pluripotent stem cells', *Nat Protoc*, 14(4), pp. 1261-1279.
- 1103 Beckett, E. A., Sanders, K. M. and Ward, S. M. (2017) 'Inhibitory responses mediated by vagal  
1104 nerve stimulation are diminished in stomachs of mice with reduced intramuscular interstitial cells  
1105 of Cajal', *Sci Rep*, 7, pp. 44759.
- 1106 Bohorquez, D. V., Shahid, R. A., Erdmann, A., Kreger, A. M., Wang, Y., Calakos, N., Wang, F.  
1107 and Liddle, R. A. (2015) 'Neuroepithelial circuit formed by innervation of sensory  
1108 enteroendocrine cells', *J Clin Invest*, 125(2), pp. 782-6.
- 1109 Breit, S., Kupferberg, A., Rogler, G. and Hasler, G. (2018) 'Vagus Nerve as Modulator of the  
1110 Brain-Gut Axis in Psychiatric and Inflammatory Disorders', *Front Psychiatry*, 9, pp. 44.
- 1111 Brookes, S. J., Spencer, N. J., Costa, M. and Zagorodnyuk, V. P. (2013) 'Extrinsic primary  
1112 afferent signalling in the gut', *Nat Rev Gastroenterol Hepatol*, 10(5), pp. 286-96.
- 1113 Chen, T. W., Wardill, T. J., Sun, Y., Pulver, S. R., Renninger, S. L., Baohan, A., Schreiter, E. R.,  
1114 Kerr, R. A., Orger, M. B., Jayaraman, V., Looger, L. L., Svoboda, K. and Kim, D. S. (2013)  
1115 'Ultrasensitive fluorescent proteins for imaging neuronal activity', *Nature*, 499(7458), pp. 295-  
1116 300.
- 1117 Choi, E., Roland, J. T., Barlow, B. J., O'Neal, R., Rich, A. E., Nam, K. T., Shi, C. and  
1118 Goldenring, J. R. (2014) 'Cell lineage distribution atlas of the human stomach reveals  
1119 heterogeneous gland populations in the gastric antrum', *Gut*, 63(11), pp. 1711-20.
- 1120 Davenport, C., Diekmann, U., Budde, I., Detering, N. and Naujok, O. (2016) 'Anterior-Posterior  
1121 Patterning of Definitive Endoderm Generated from Human Embryonic Stem Cells Depends on  
1122 the Differential Signaling of Retinoic Acid, Wnt-, and BMP-Signaling', *Stem Cells*, 34(11), pp.  
1123 2635-2647.
- 1124 de Santa Barbara, P., van den Brink, G. R. and Roberts, D. J. (2002) 'Molecular etiology of gut  
1125 malformations and diseases', *Am J Med Genet*, 115(4), pp. 221-30.
- 1126 De Santa Barbara, P., Williams, J., Goldstein, A. M., Doyle, A. M., Nielsen, C., Winfield, S.,  
1127 Faure, S. and Roberts, D. J. (2005) 'Bone morphogenetic protein signaling pathway plays  
1128 multiple roles during gastrointestinal tract development', *Dev Dyn*, 234(2), pp. 312-22.
- 1129 Eicher, A. K., Berns, H. M. and Wells, J. M. (2018) 'Translating Developmental Principles to  
1130 Generate Human Gastric Organoids', *Cell Mol Gastroenterol Hepatol*, 5(3), pp. 353-363.
- 1131 Faure, S., de Santa Barbara, P., Roberts, D. J. and Whitman, M. (2002) 'Endogenous patterns  
1132 of BMP signaling during early chick development', *Dev Biol*, 244(1), pp. 44-65.

- 1133 Faure, S., Georges, M., McKey, J., Sagnol, S. and de Santa Barbara, P. (2013) 'Expression  
1134 pattern of the homeotic gene Bapx1 during early chick gastrointestinal tract development', *Gene*  
1135 *Expr Patterns*, 13(8), pp. 287-92.
- 1136 Faure, S., McKey, J., Sagnol, S. and de Santa Barbara, P. (2015) 'Enteric neural crest cells  
1137 regulate vertebrate stomach patterning and differentiation', *Development*, 142(2), pp. 331-42.
- 1138 Freddo, A. M., Shoffner, S. K., Shao, Y., Taniguchi, K., Grosse, A. S., Guysinger, M. N., Wang,  
1139 S., Rudraraju, S., Margolis, B., Garikipati, K., Schnell, S. and Gumucio, D. L. (2016)  
1140 'Coordination of signaling and tissue mechanics during morphogenesis of murine intestinal villi:  
1141 a role for mitotic cell rounding', *Integr Biol (Camb)*, 8(9), pp. 918-28.
- 1142 Furness, J. B., Di Natale, M., Hunne, B., Oparija-Rogenmozere, L., Ward, S. M., Sasse, K. C.,  
1143 Powley, T. L., Stebbing, M. J., Jaffey, D. and Fothergill, L. J. (2020) 'The identification of  
1144 neuronal control pathways supplying effector tissues in the stomach', *Cell Tissue Res*, 382(3),  
1145 pp. 433-445.
- 1146 Gilbert, M. A., Schultz-Rogers, L., Rajagopalan, R., Grochowski, C. M., Wilkins, B. J., Biswas,  
1147 S., Conlin, L. K., Fiorino, K. N., Dhamija, R., Pack, M. A., Klee, E. W., Piccoli, D. A. and Spinner,  
1148 N. B. (2020) 'Protein-elongating mutations in MYH11 are implicated in a dominantly inherited  
1149 smooth muscle dysmotility syndrome with severe esophageal, gastric, and intestinal disease',  
1150 *Hum Mutat*, 41(5), pp. 973-982.
- 1151 Goodwin, K., Mao, S., Guyomar, T., Miller, E., Radisky, D. C., Košmrlj, A. and Nelson, C. M.  
1152 (2019) 'Smooth muscle differentiation shapes domain branches during mouse lung  
1153 development', *Development*, 146(22).
- 1154 Han, L., Chaturvedi, P., Kishimoto, K., Koike, H., Nasr, T., Iwasawa, K., Giesbrecht, K., Witcher,  
1155 P. C., Eicher, A., Haines, L., Lee, Y., Shannon, J. M., Morimoto, M., Wells, J. M., Takebe, T.  
1156 and Zorn, A. M. (2020) 'Single cell transcriptomics identifies a signaling network coordinating  
1157 endoderm and mesoderm diversification during foregut organogenesis', *Nature*  
1158 *Communications*, 11.
- 1159 Huycke, T. R., Miller, B. M., Gill, H. K., Nerurkar, N. L., Sprinzak, D., Mahadevan, L. and Tabin,  
1160 C. J. (2019) 'Genetic and Mechanical Regulation of Intestinal Smooth Muscle Development',  
1161 *Cell*, 179(1), pp. 90-105.e21.
- 1162 Iino, S. and Horiguchi, K. (2006) 'Interstitial cells of cajal are involved in neurotransmission in  
1163 the gastrointestinal tract', *Acta Histochem Cytochem*, 39(6), pp. 145-53.
- 1164 Kaelberer, M. M., Buchanan, K. L., Klein, M. E., Barth, B. B., Montoya, M. M., Shen, X. and  
1165 Bohorquez, D. V. (2018) 'A gut-brain neural circuit for nutrient sensory transduction', *Science*,  
1166 361(6408).
- 1167 Kim, B. M., Buchner, G., Miletich, I., Sharpe, P. T. and Shivdasani, R. A. (2005) 'The stomach  
1168 mesenchymal transcription factor Barx1 specifies gastric epithelial identity through inhibition of  
1169 transient Wnt signaling', *Dev Cell*, 8(4), pp. 611-22.
- 1170 Kim, T. H. and Shivdasani, R. A. (2016) 'Stomach development, stem cells and disease',  
1171 *Development*, 143(4), pp. 554-65.
- 1172 Knox, S. M., Lombaert, I. M., Reed, X., Vitale-Cross, L., Gutkind, J. S. and Hoffman, M. P.  
1173 (2010) 'Parasympathetic innervation maintains epithelial progenitor cells during salivary  
1174 organogenesis', *Science*, 329(5999), pp. 1645-7.
- 1175 Lasrado, R., Boesmans, W., Kleinjung, J., Pin, C., Bell, D., Bhaw, L., McCallum, S., Zong, H.,  
1176 Luo, L., Clevers, H., Vanden Berghe, P. and Pachnis, V. (2017) 'Lineage-dependent spatial and

- 1177 functional organization of the mammalian enteric nervous system', *Science*, 356(6339), pp. 722-  
1178 726.
- 1179 Le Guen, L., Marchal, S., Faure, S. and de Santa Barbara, P. (2015) 'Mesenchymal-epithelial  
1180 interactions during digestive tract development and epithelial stem cell regeneration', *Cell Mol*  
1181 *Life Sci*, 72(20), pp. 3883-96.
- 1182 Li, Z., Chalazonitis, A., Huang, Y. Y., Mann, J. J., Margolis, K. G., Yang, Q. M., Kim, D. O.,  
1183 Côté, F., Mallet, J. and Gershon, M. D. (2011) 'Essential roles of enteric neuronal serotonin in  
1184 gastrointestinal motility and the development/survival of enteric dopaminergic neurons', *J*  
1185 *Neurosci*, 31(24), pp. 8998-9009.
- 1186 Loh, K. M., Chen, A., Koh, P. W., Deng, T. Z., Sinha, R., Tsai, J. M., Barkal, A. A., Shen, K. Y.,  
1187 Jain, R., Morganti, R. M., Shyh-Chang, N., Fernhoff, N. B., George, B. M., Wernig, G., Salomon,  
1188 R. E. A., Chen, Z., Vogel, H., Epstein, J. A., Kundaje, A., Talbot, W. S., Beachy, P. A., Ang, L. T.  
1189 and Weissman, I. L. (2016) 'Mapping the Pairwise Choices Leading from Pluripotency to Human  
1190 Bone, Heart, and Other Mesoderm Cell Types', *Cell*, 166(2), pp. 451-467.
- 1191 McCauley, H. A., Matthis, A. L., Enriquez, J. R., Nichol, J. T., Sanchez, J. G., Stone, W. J.,  
1192 Sundaram, N., Helmroth, M. A., Montrose, M. H., Aihara, E. and Wells, J. M. (2020)  
1193 'Enteroendocrine cells couple nutrient sensing to nutrient absorption by regulating ion transport',  
1194 *Nat Commun*, 11(1), pp. 4791.
- 1195 McCracken, K. W., Aihara, E., Martin, B., Crawford, C. M., Broda, T., Treguier, J., Zhang, X.,  
1196 Shannon, J. M., Montrose, M. H. and Wells, J. M. (2017) 'Wnt/beta-catenin promotes gastric  
1197 fundus specification in mice and humans', *Nature*, 541(7636), pp. 182-187.
- 1198 McCracken, K. W., Cata, E. M., Crawford, C. M., Sinagoga, K. L., Schumacher, M., Rockich, B.  
1199 E., Tsai, Y. H., Mayhew, C. N., Spence, J. R., Zavros, Y. and Wells, J. M. (2014) 'Modelling  
1200 human development and disease in pluripotent stem-cell-derived gastric organoids', *Nature*,  
1201 516(7531), pp. 400-4.
- 1202 Moniot, B., Biau, S., Faure, S., Nielsen, C. M., Berta, P., Roberts, D. J. and de Santa Barbara,  
1203 P. (2004) 'SOX9 specifies the pyloric sphincter epithelium through mesenchymal-epithelial  
1204 signals', *Development*, 131(15), pp. 3795-804.
- 1205 Munera, J. O. and Wells, J. M. (2017) 'Generation of Gastrointestinal Organoids from Human  
1206 Pluripotent Stem Cells', *Methods Mol Biol*, 1597, pp. 167-177.
- 1207 Múnera, J. O., Sundaram, N., Rankin, S. A., Hill, D., Watson, C., Mahe, M., Vallance, J. E.,  
1208 Shroyer, N. F., Sinagoga, K. L., Zarzoso-Lacoste, A., Hudson, J. R., Howell, J. C., Chaturvedi,  
1209 P., Spence, J. R., Shannon, J. M., Zorn, A. M., Helmroth, M. A. and Wells, J. M. (2017)  
1210 'Differentiation of Human Pluripotent Stem Cells into Colonic Organoids via Transient Activation  
1211 of BMP Signaling', *Cell Stem Cell*, 21(1), pp. 51-64.e6.
- 1212 Nagy, N., Barad, C., Graham, H. K., Hotta, R., Cheng, L. S., Fejszak, N. and Goldstein, A. M.  
1213 (2016) 'Sonic hedgehog controls enteric nervous system development by patterning the  
1214 extracellular matrix', *Development*, 143(2), pp. 264-75.
- 1215 Nagy, N. and Goldstein, A. M. (2017) 'Enteric nervous system development: A crest cell's  
1216 journey from neural tube to colon', *Semin Cell Dev Biol*, 66, pp. 94-106.
- 1217 Nedvetsky, P. I., Emmerson, E., Finley, J. K., Ettinger, A., Cruz-Pacheco, N., Prochazka, J.,  
1218 Haddox, C. L., Northrup, E., Hodges, C., Mostov, K. E., Hoffman, M. P. and Knox, S. M. (2014)  
1219 'Parasympathetic innervation regulates tubulogenesis in the developing salivary gland', *Dev*  
1220 *Cell*, 30(4), pp. 449-62.

- 1221 Norlen, P., Ericsson, P., Kitano, M., Ekelund, M. and Hakanson, R. (2005) 'The vagus regulates  
1222 histamine mobilization from rat stomach ECL cells by controlling their sensitivity to gastrin', *J*  
1223 *Physiol*, 564(Pt 3), pp. 895-905.
- 1224 Poling, H. M., Wu, D., Brown, N., Baker, M., Hausfeld, T. A., Huynh, N., Chaffron, S., Dunn, J.  
1225 C. Y., Hogan, S. P., Wells, J. M., Helmrath, M. A. and Mahe, M. M. (2018) 'Mechanically  
1226 induced development and maturation of human intestinal organoids in vivo', *Nat Biomed Eng*,  
1227 2(6), pp. 429-442.
- 1228 Rakhilin, N., Barth, B., Choi, J., Munoz, N. L., Kulkarni, S., Jones, J. S., Small, D. M., Cheng, Y.  
1229 T., Cao, Y., LaVinka, C., Kan, E., Dong, X., Spencer, M., Pasricha, P., Nishimura, N. and Shen,  
1230 X. (2016) 'Simultaneous optical and electrical in vivo analysis of the enteric nervous system',  
1231 *Nat Commun*, 7, pp. 11800.
- 1232 Roberts, D. J., Johnson, R. L., Burke, A. C., Nelson, C. E., Morgan, B. A. and Tabin, C. (1995)  
1233 'Sonic hedgehog is an endodermal signal inducing Bmp-4 and Hox genes during induction and  
1234 regionalization of the chick hindgut', *Development*, 121(10), pp. 3163-74.
- 1235 Roberts, D. J., Smith, D. M., Goff, D. J. and Tabin, C. J. (1998) 'Epithelial-mesenchymal  
1236 signaling during the regionalization of the chick gut', *Development*, 125(15), pp. 2791-801.
- 1237 Rydning, A., Lyng, O., Falkmer, S. and Grønbech, J. E. (2002) 'Histamine is involved in gastric  
1238 vasodilation during acid back diffusion via activation of sensory neurons', *Am J Physiol*  
1239 *Gastrointest Liver Physiol*, 283(3), pp. G603-11.
- 1240 Shaylor, L. A., Hwang, S. J., Sanders, K. M. and Ward, S. M. (2016) 'Convergence of inhibitory  
1241 neural inputs regulate motor activity in the murine and monkey stomach', *Am J Physiol*  
1242 *Gastrointest Liver Physiol*, 311(5), pp. G838-g851.
- 1243 Shyer, A. E., Tallinen, T., Nerurkar, N. L., Wei, Z., Gil, E. S., Kaplan, D. L., Tabin, C. J. and  
1244 Mahadevan, L. (2013) 'Villification: how the gut gets its villi', *Science*, 342(6155), pp. 212-8.
- 1245 Simoes-Costa, M. and Bronner, M. E. (2015) 'Establishing neural crest identity: a gene  
1246 regulatory recipe', *Development*, 142(2), pp. 242-57.
- 1247 Smith, D. M., Nielsen, C., Tabin, C. J. and Roberts, D. J. (2000) 'Roles of BMP signaling and  
1248 Nkx2.5 in patterning at the chick midgut-foregut boundary', *Development*, 127(17), pp. 3671-81.
- 1249 Smith, D. M. and Tabin, C. J. (1999) 'BMP signalling specifies the pyloric sphincter', *Nature*,  
1250 402(6763), pp. 748-9.
- 1251 Stevens, M. L., Chaturvedi, P., Rankin, S. A., Macdonald, M., Jagannathan, S., Yukawa, M.,  
1252 Barski, A. and Zorn, A. M. (2017) 'Genomic integration of Wnt/beta-catenin and BMP/Smad1  
1253 signaling coordinates foregut and hindgut transcriptional programs', *Development*, 144(7), pp.  
1254 1283-1295.
- 1255 Sung, T. S., Hwang, S. J., Koh, S. D., Bayguinov, Y., Peri, L. E., Blair, P. J., Webb, T. I., Pardo,  
1256 D. M., Rock, J. R., Sanders, K. M. and Ward, S. M. (2018) 'The cells and conductance  
1257 mediating cholinergic neurotransmission in the murine proximal stomach', *J Physiol*, 596(9), pp.  
1258 1549-1574.
- 1259 Tan, S. H., Swathi, Y., Tan, S., Goh, J., Seishima, R., Murakami, K., Oshima, M., Tsuji, T.,  
1260 Phuah, P., Tan, L. T., Wong, E., Fatehullah, A., Sheng, T., Ho, S. W. T., Grabsch, H. I.,  
1261 Srivastava, S., Teh, M., Denil, S., Mustafah, S., Tan, P., Shabbir, A., So, J., Yeoh, K. G. and  
1262 Barker, N. (2020) 'AQP5 enriches for stem cells and cancer origins in the distal stomach',  
1263 *Nature*, 578(7795), pp. 437-443.



- 1264 Theodosiou, N. A. and Tabin, C. J. (2005) 'Sox9 and Nkx2.5 determine the pyloric sphincter  
1265 epithelium under the control of BMP signaling', *Dev Biol*, 279(2), pp. 481-90.
- 1266 Tiso, N., Filippi, A., Pauls, S., Bortolussi, M. and Argenton, F. (2002) 'BMP signalling regulates  
1267 anteroposterior endoderm patterning in zebrafish', *Mech Dev*, 118(1-2), pp. 29-37.
- 1268 Walsh, K. T. and Zemper, A. E. (2019) 'The Enteric Nervous System for Epithelial Researchers:  
1269 Basic Anatomy, Techniques, and Interactions With the Epithelium', *Cell Mol Gastroenterol  
1270 Hepatol*, 8(3), pp. 369-378.
- 1271 Walton, K. D., Kolterud, A., Czerwinski, M. J., Bell, M. J., Prakash, A., Kushwaha, J., Grosse, A.  
1272 S., Schnell, S. and Gumucio, D. L. (2012) 'Hedgehog-responsive mesenchymal clusters direct  
1273 patterning and emergence of intestinal villi', *Proc Natl Acad Sci U S A*, 109(39), pp. 15817-22.
- 1274 Wang, Y., Shi, C., Lu, Y., Poulin, E. J., Franklin, J. L. and Coffey, R. J. (2015) 'Loss of Lrig1  
1275 leads to expansion of Brunner glands followed by duodenal adenomas with gastric metaplasia',  
1276 *Am J Pathol*, 185(4), pp. 1123-34.
- 1277 Ward, S. M. and Sanders, K. M. (2006) 'Involvement of intramuscular interstitial cells of Cajal in  
1278 neuroeffector transmission in the gastrointestinal tract', *J Physiol*, 576(Pt 3), pp. 675-82.
- 1279 Watson, C. L., Mahe, M. M., Munera, J., Howell, J. C., Sundaram, N., Poling, H. M., Schweitzer,  
1280 J. I., Vallance, J. E., Mayhew, C. N., Sun, Y., Grabowski, G., Finkbeiner, S. R., Spence, J. R.,  
1281 Shroyer, N. F., Wells, J. M. and Helmuth, M. A. (2014) 'An in vivo model of human small  
1282 intestine using pluripotent stem cells', *Nat Med*, 20(11), pp. 1310-4.
- 1283 Westfal, M. L. and Goldstein, A. M. (2017) 'Pediatric enteric neuropathies: diagnosis and current  
1284 management', *Curr Opin Pediatr*.
- 1285 Workman, M. J., Mahe, M. M., Trisno, S., Poling, H. M., Watson, C. L., Sundaram, N., Chang,  
1286 C. F., Schiesser, J., Aubert, P., Stanley, E. G., Elefanty, A. G., Miyaoka, Y., Mandegar, M. A.,  
1287 Conklin, B. R., Neunlist, M., Brugmann, S. A., Helmuth, M. A. and Wells, J. M. (2017)  
1288 'Engineered human pluripotent-stem-cell-derived intestinal tissues with a functional enteric  
1289 nervous system', *Nat Med*, 23(1), pp. 49-59.
- 1290 Zhang, X., McGrath, P. S., Salomone, J., Rahal, M., McCauley, H. A., Schweitzer, J., Kovall, R.,  
1291 Gebelein, B. and Wells, J. M. (2019) 'A Comprehensive Structure-Function Study of  
1292 Neurogenin3 Disease-Causing Alleles during Human Pancreas and Intestinal Organoid  
1293 Development', *Dev Cell*, 50(3), pp. 367-380.e7.
- 1294 Zhao, C. M., Martinez, V., Piqueras, L., Wang, L., Taché, Y. and Chen, D. (2008) 'Control of  
1295 gastric acid secretion in somatostatin receptor 2 deficient mice: shift from endocrine/paracrine to  
1296 neurocrine pathways', *Endocrinology*, 149(2), pp. 498-505.

bioRxiv preprint doi: <https://doi.org/10.1101/2021.07.15.458523>; this version posted July 16, 2021. The copyright holder for this preprint (which was not certified by peer review) is the author/funder. All rights reserved. No reuse allowed without permission.

# Figure 1. Incorporation of hPSC-derived splanchnic mesenchyme into hAGOs.

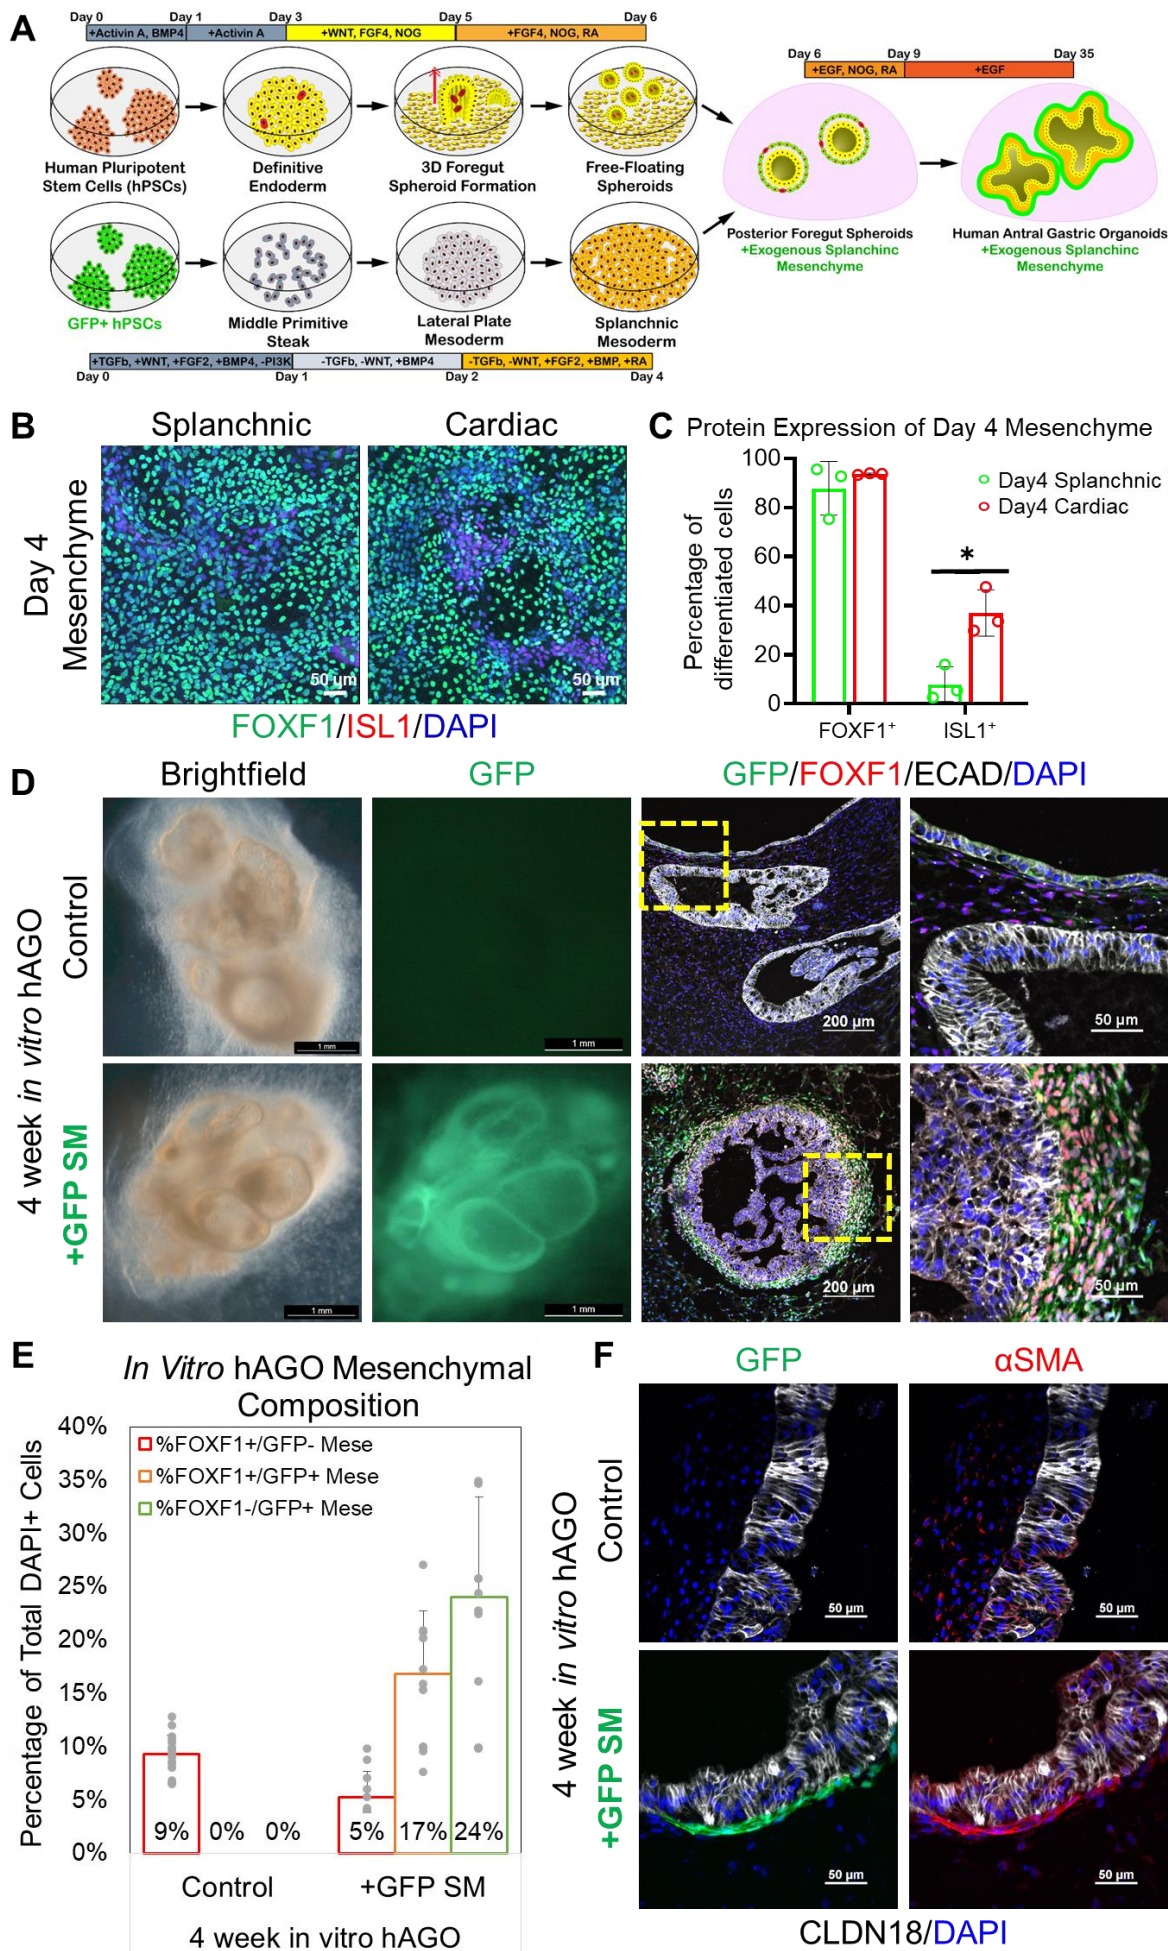

bioRxiv preprint doi: <https://doi.org/10.1101/2021.07.15.452523>; this version posted July 16, 2021. The copyright holder for this preprint (which was not certified by peer review) is the author/funder, who has granted bioRxiv a license to display the preprint in perpetuity. It is made available under aCC-BY 4.0 International license.

## Figure 2. Three germ layer organoids form human gastric tissue with innervated layers of smooth muscle and glandular epithelium.

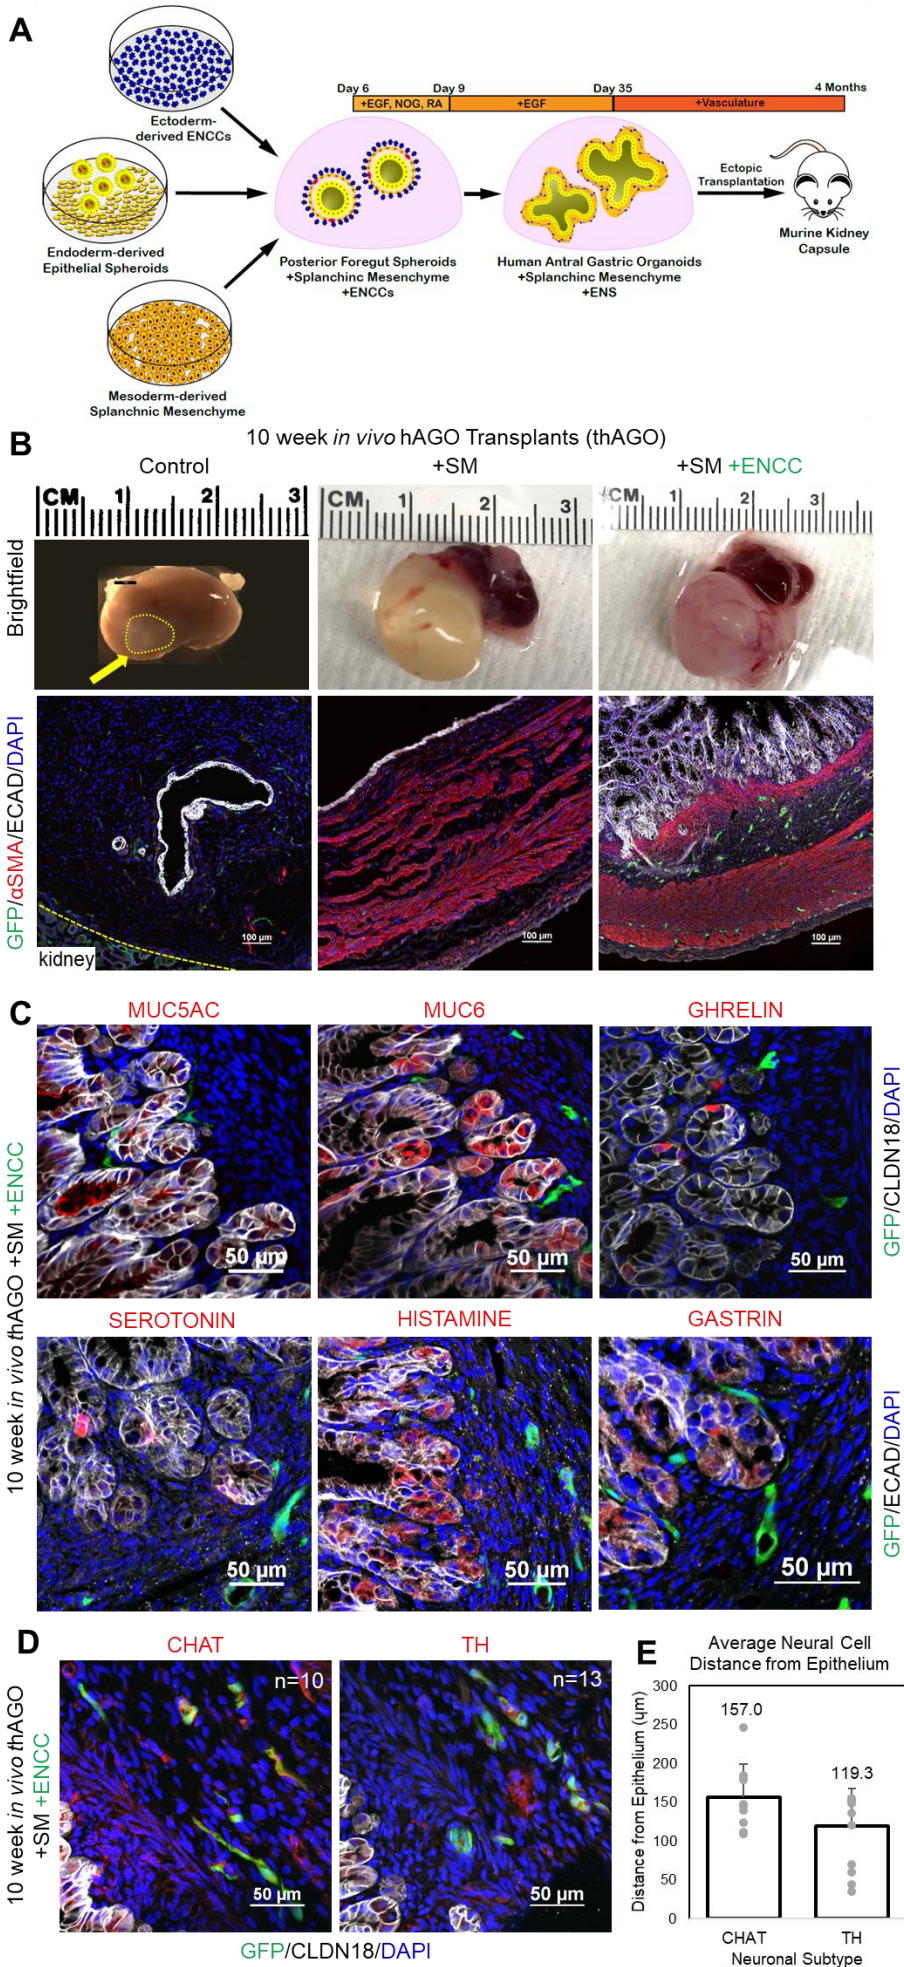

bioRxiv preprint doi: <https://doi.org/10.1101/2021.07.15.452523>; this version posted July 16, 2021. The copyright holder for this preprint (which was not certified by peer review) is the author/funder, who has granted bioRxiv a license to display the preprint in perpetuity. It is made available under aCC-BY 4.0 International license.

# Figure 3. A comparison of engineered antral and fundic organoid tissue with the human stomach.

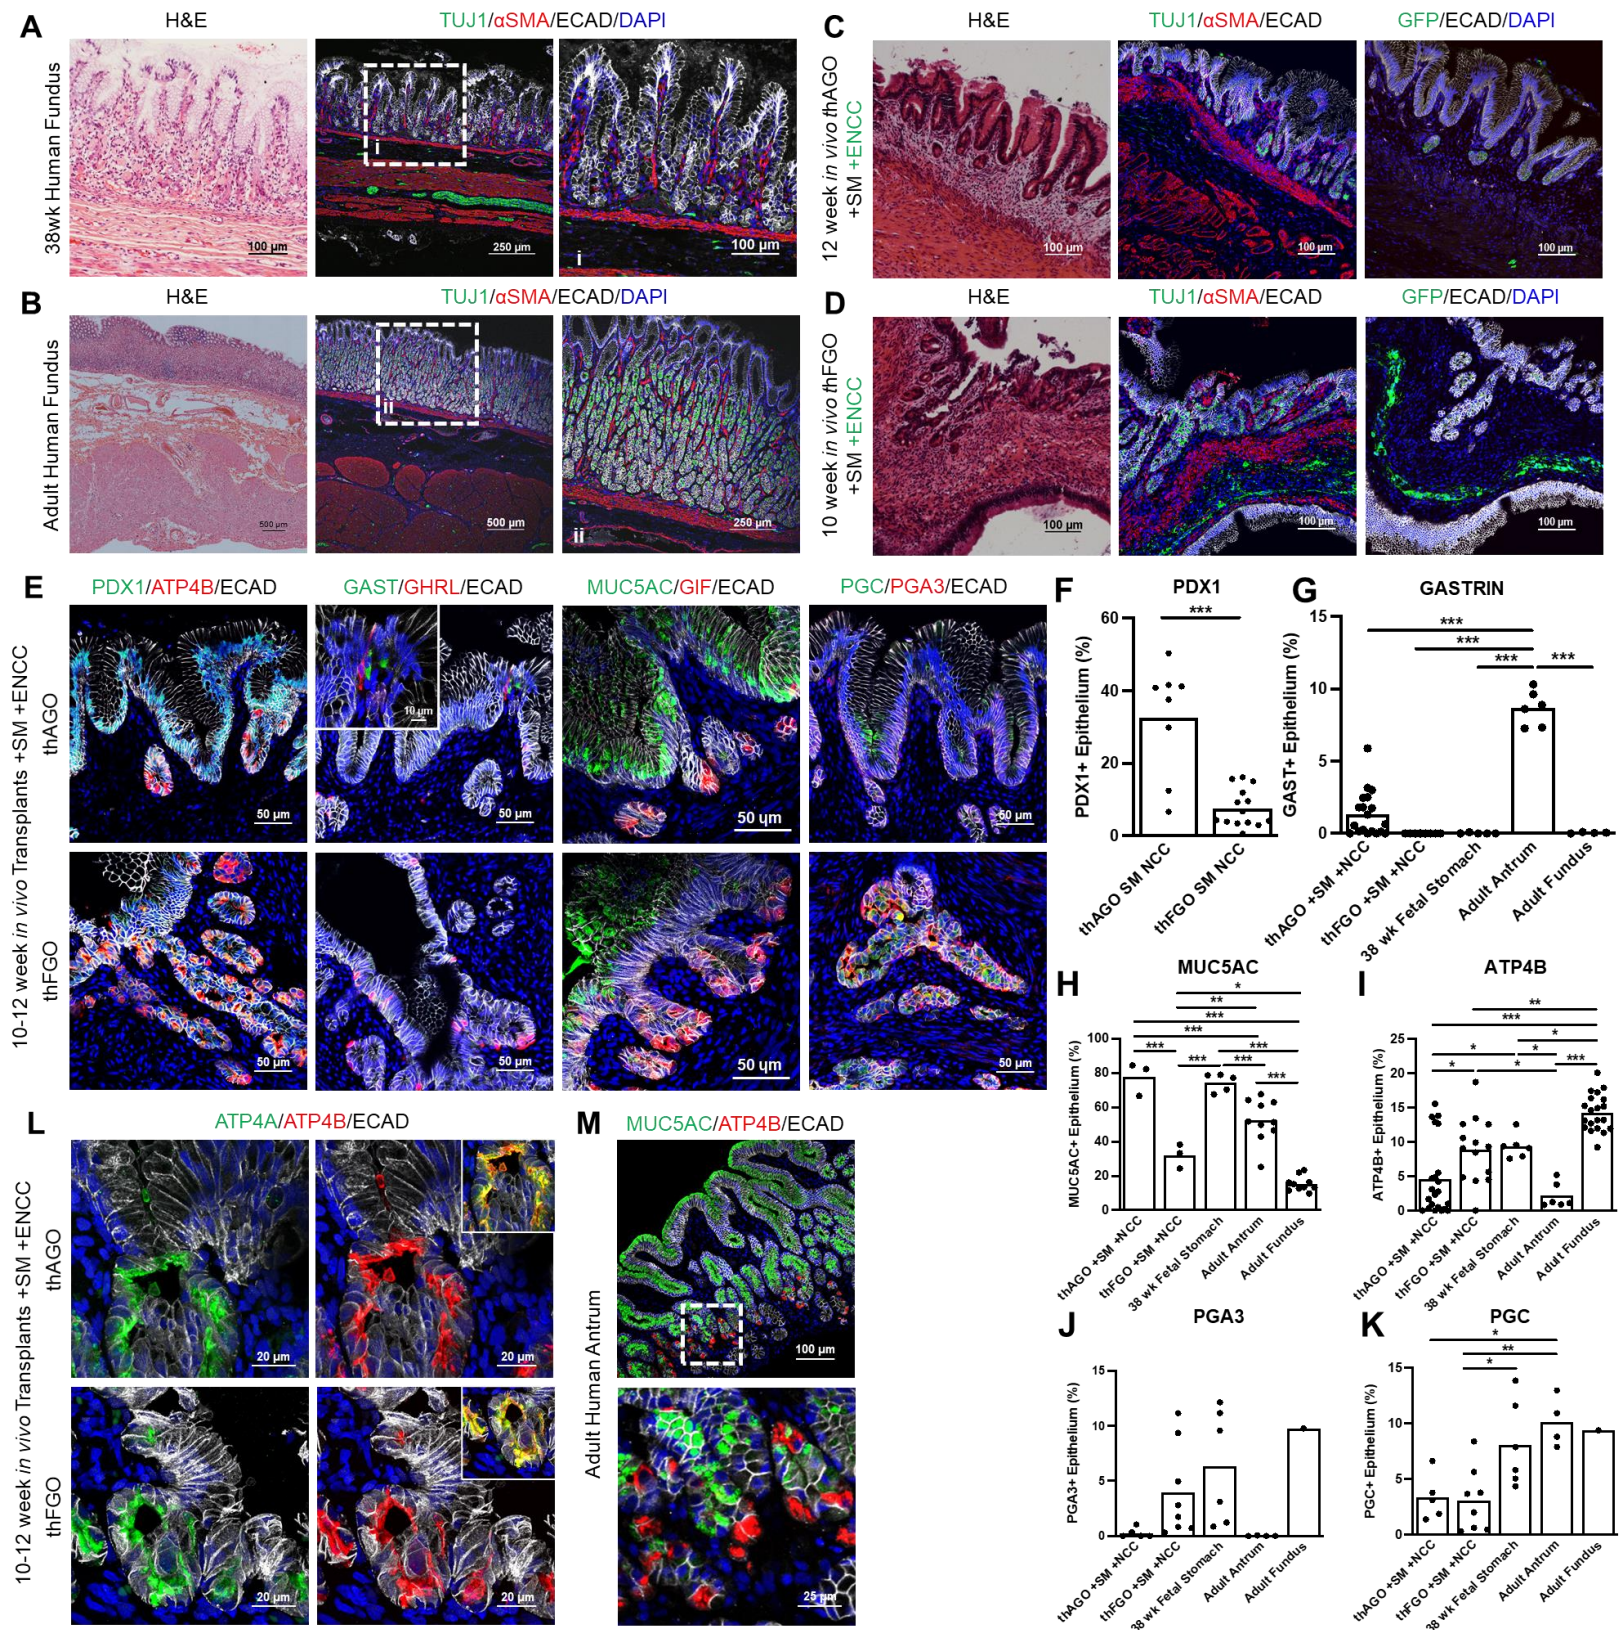

**Figure 4. Anterior three germ layer organoids have a functional ENS that regulates gastric tissue contractions.**

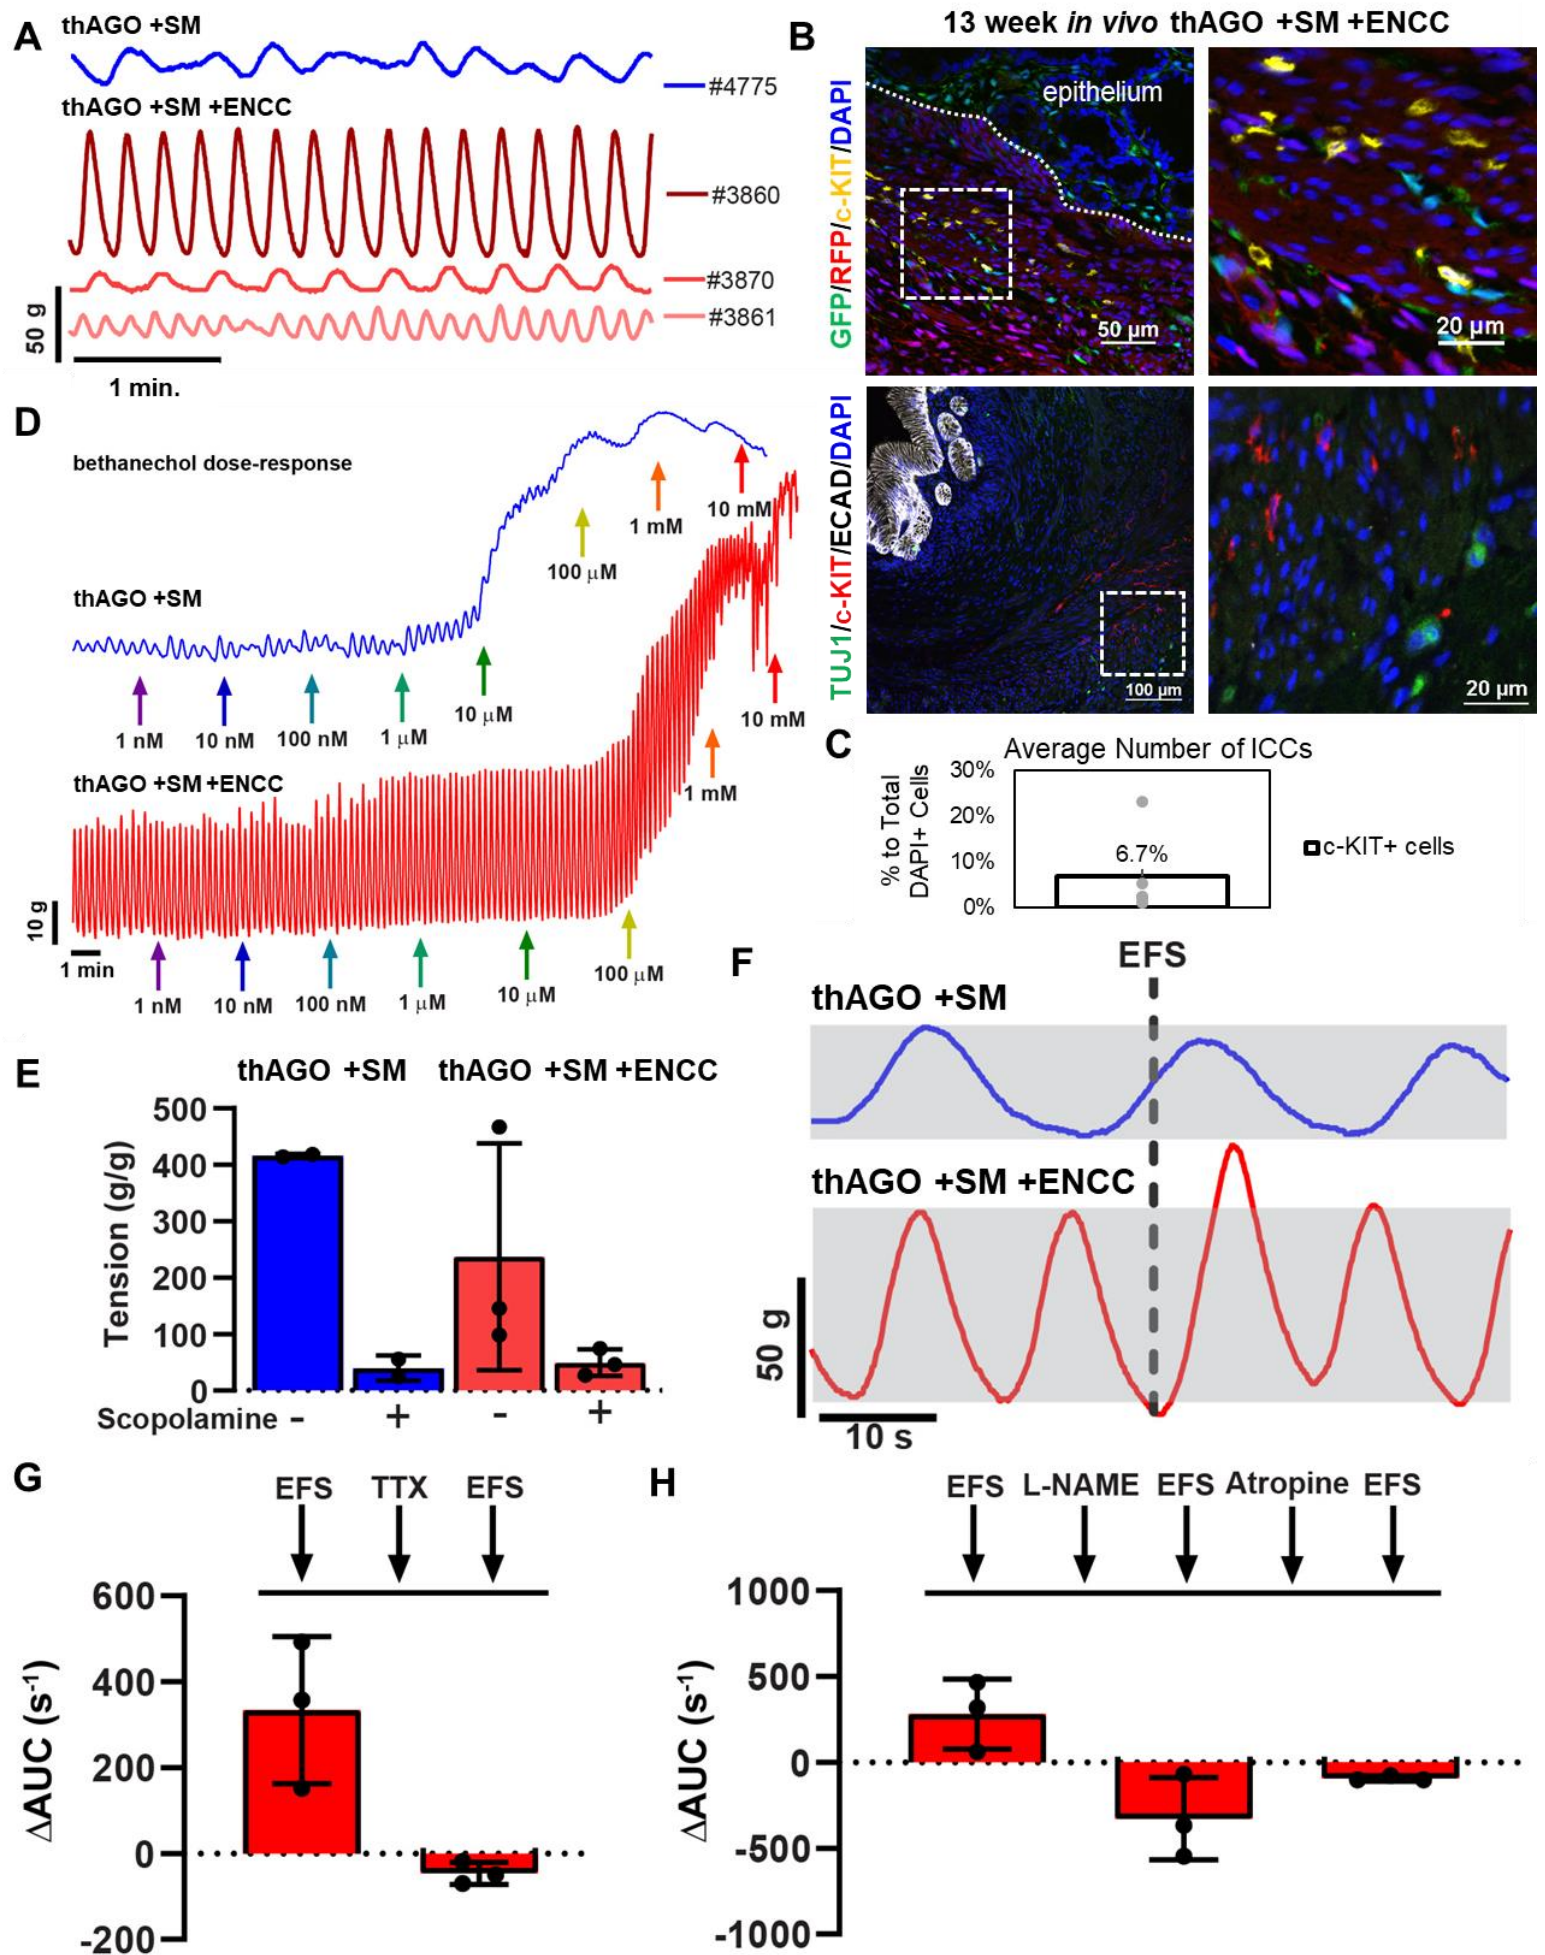

**Figure 5. ENS cells promote *in vitro* growth and patterning of gastric mesenchyme.**

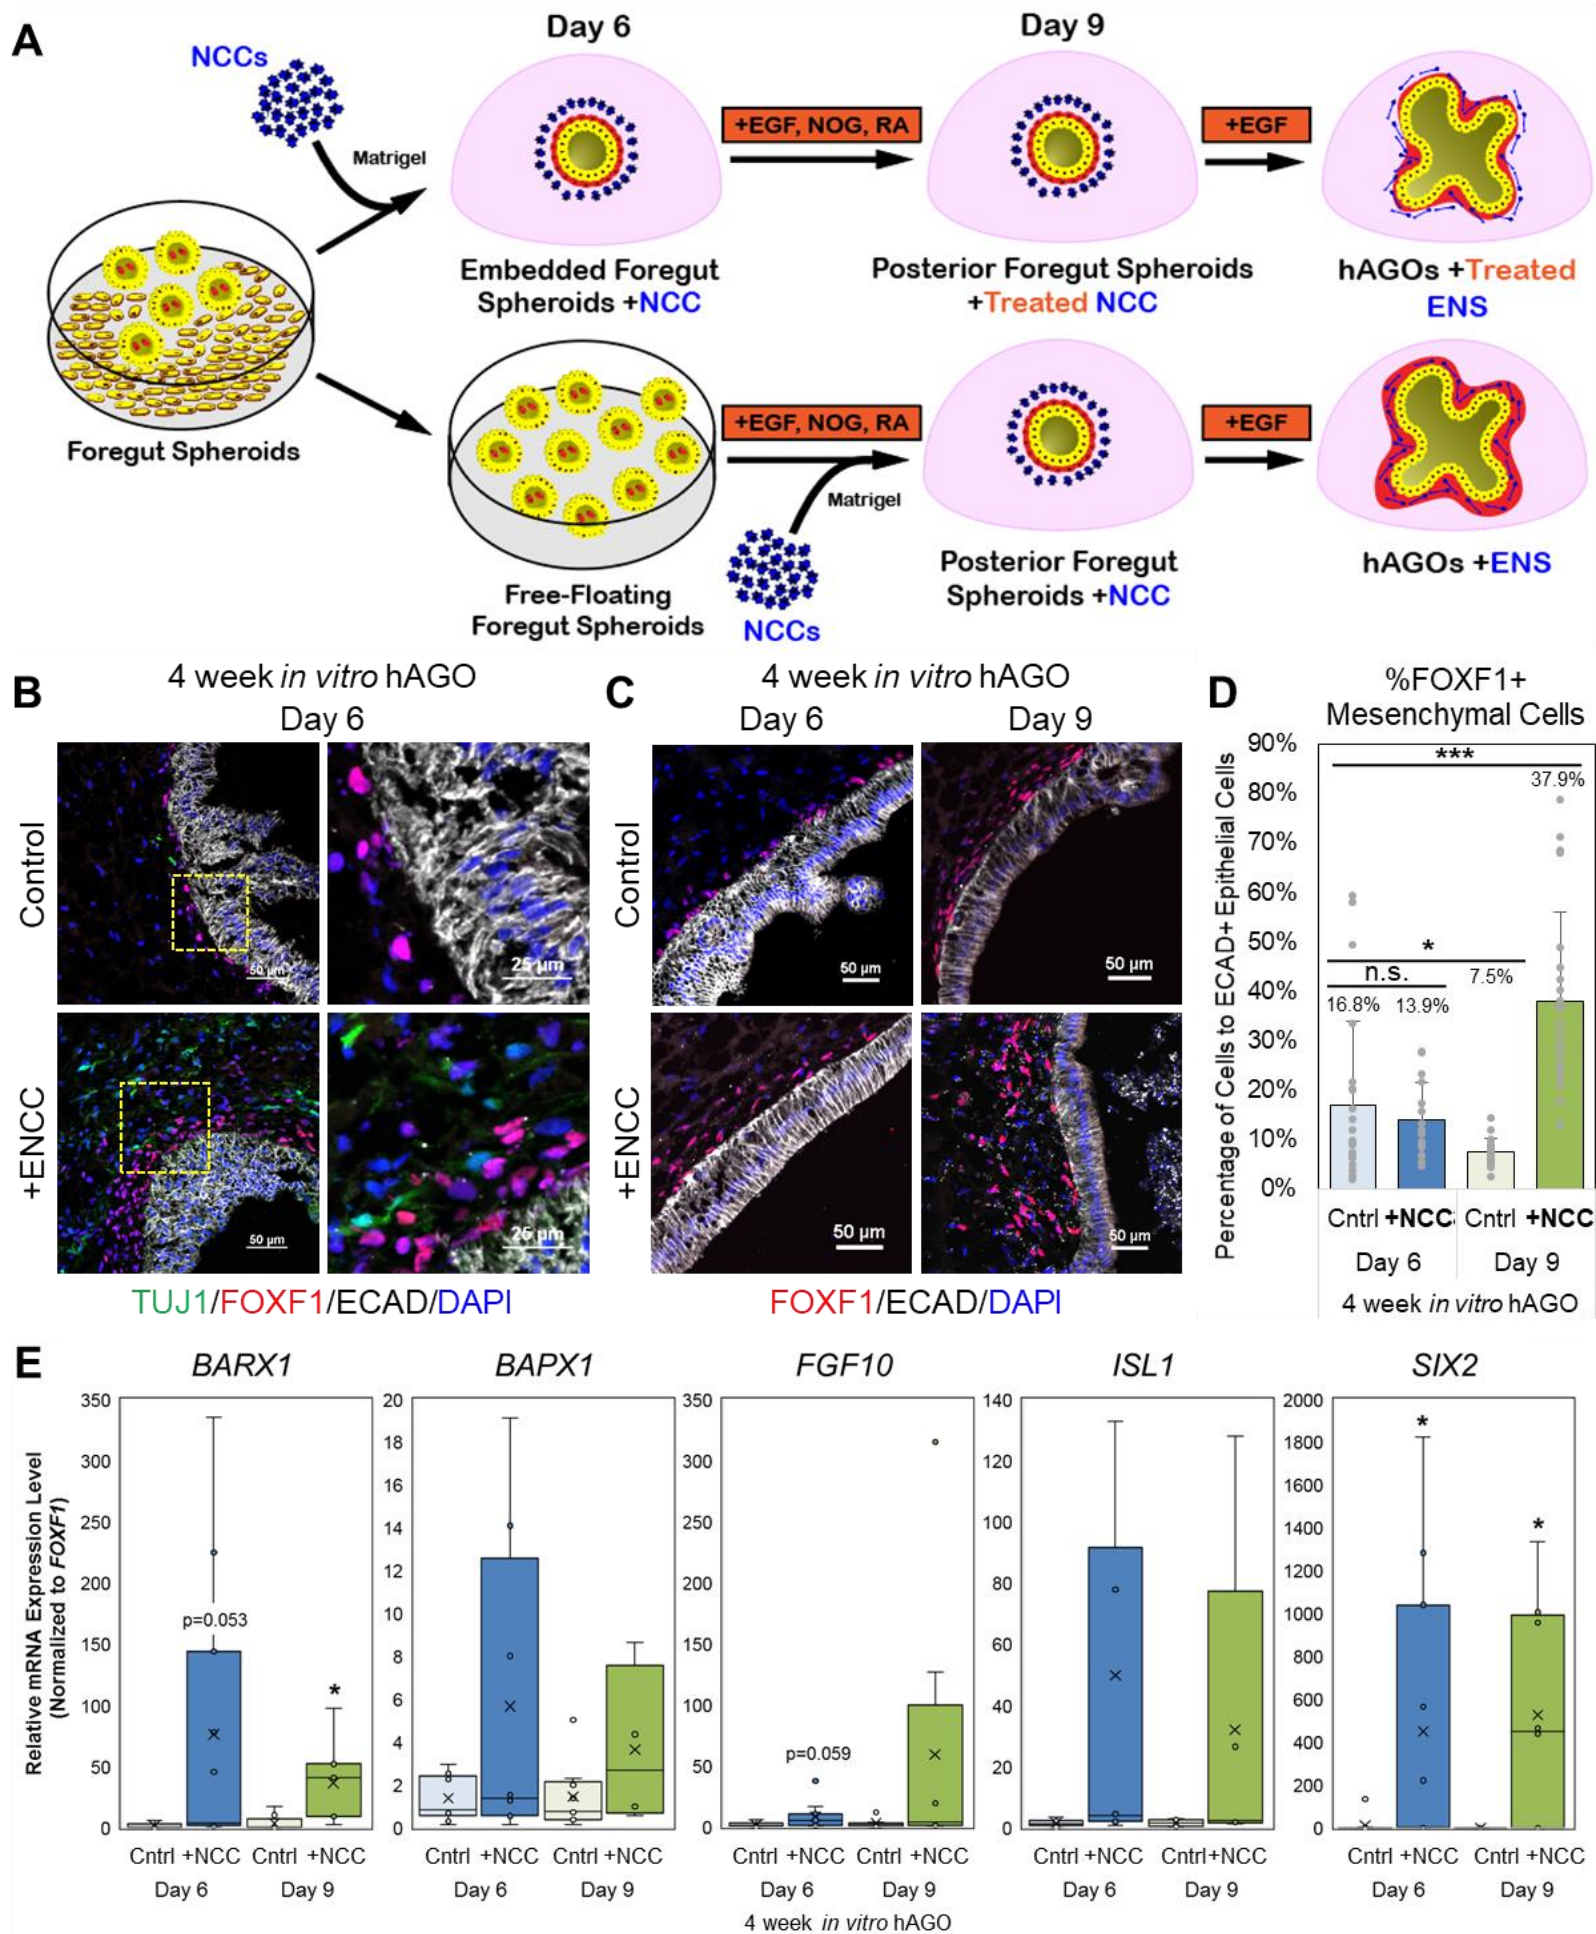

# Figure 6. ENCCs promote hAGO engraftment and epithelial growth.

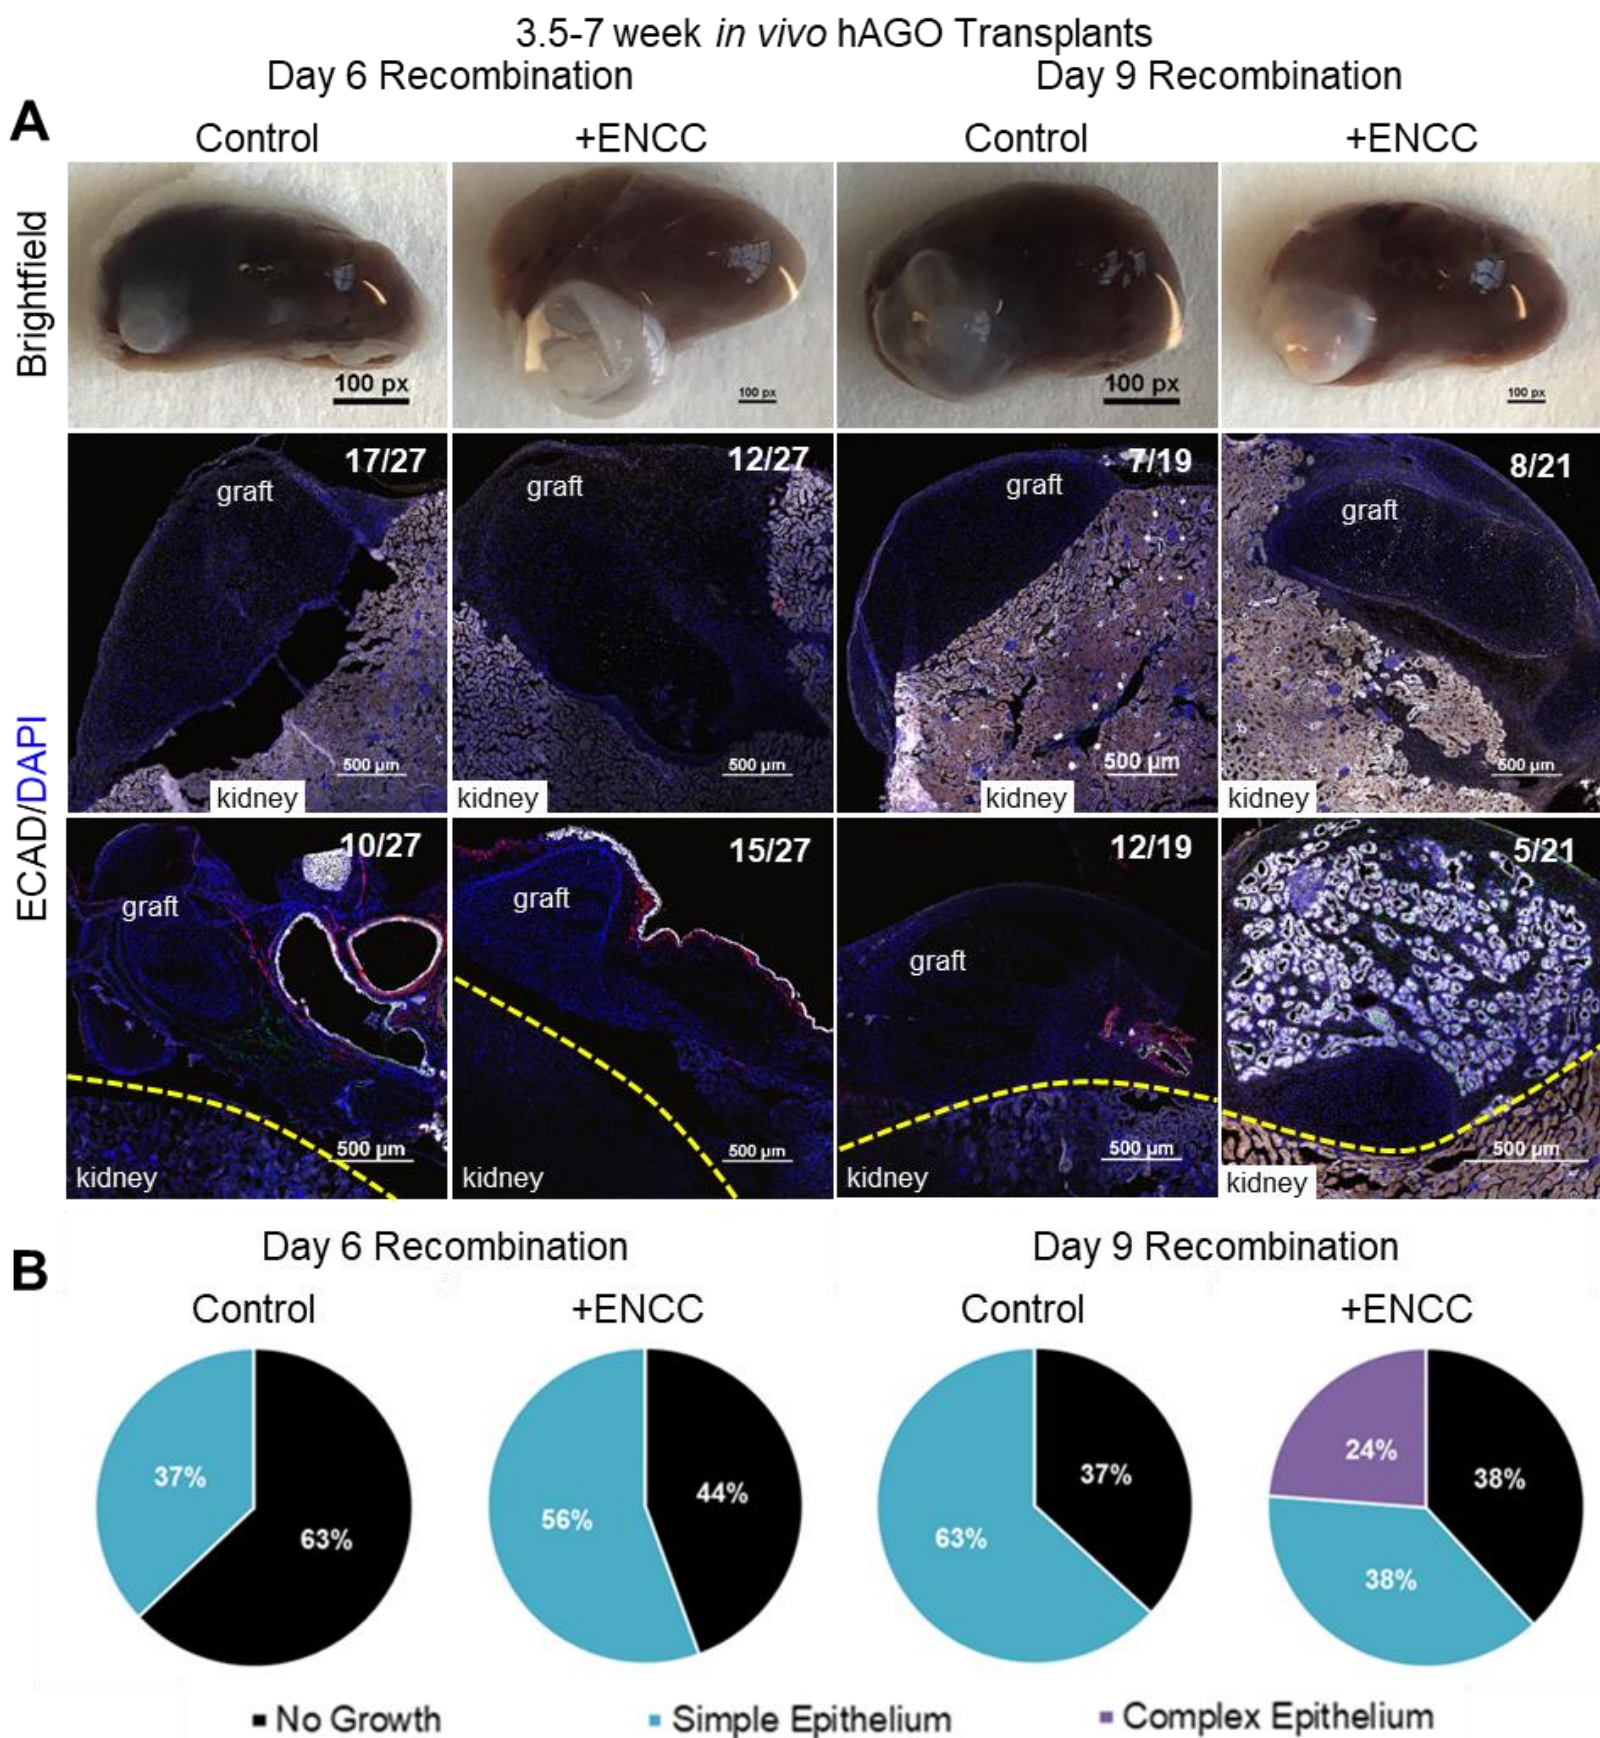

bioRxiv preprint doi: <https://doi.org/10.1101/2021.07.15.453523>; this version posted July 16, 2021. The copyright holder for this preprint (which was not certified by peer review) is the author/funder. All rights reserved. No reuse allowed without permission.

# Figure 7. Identification of thAGO + ENCC glandular epithelium as Brunner's Glands.

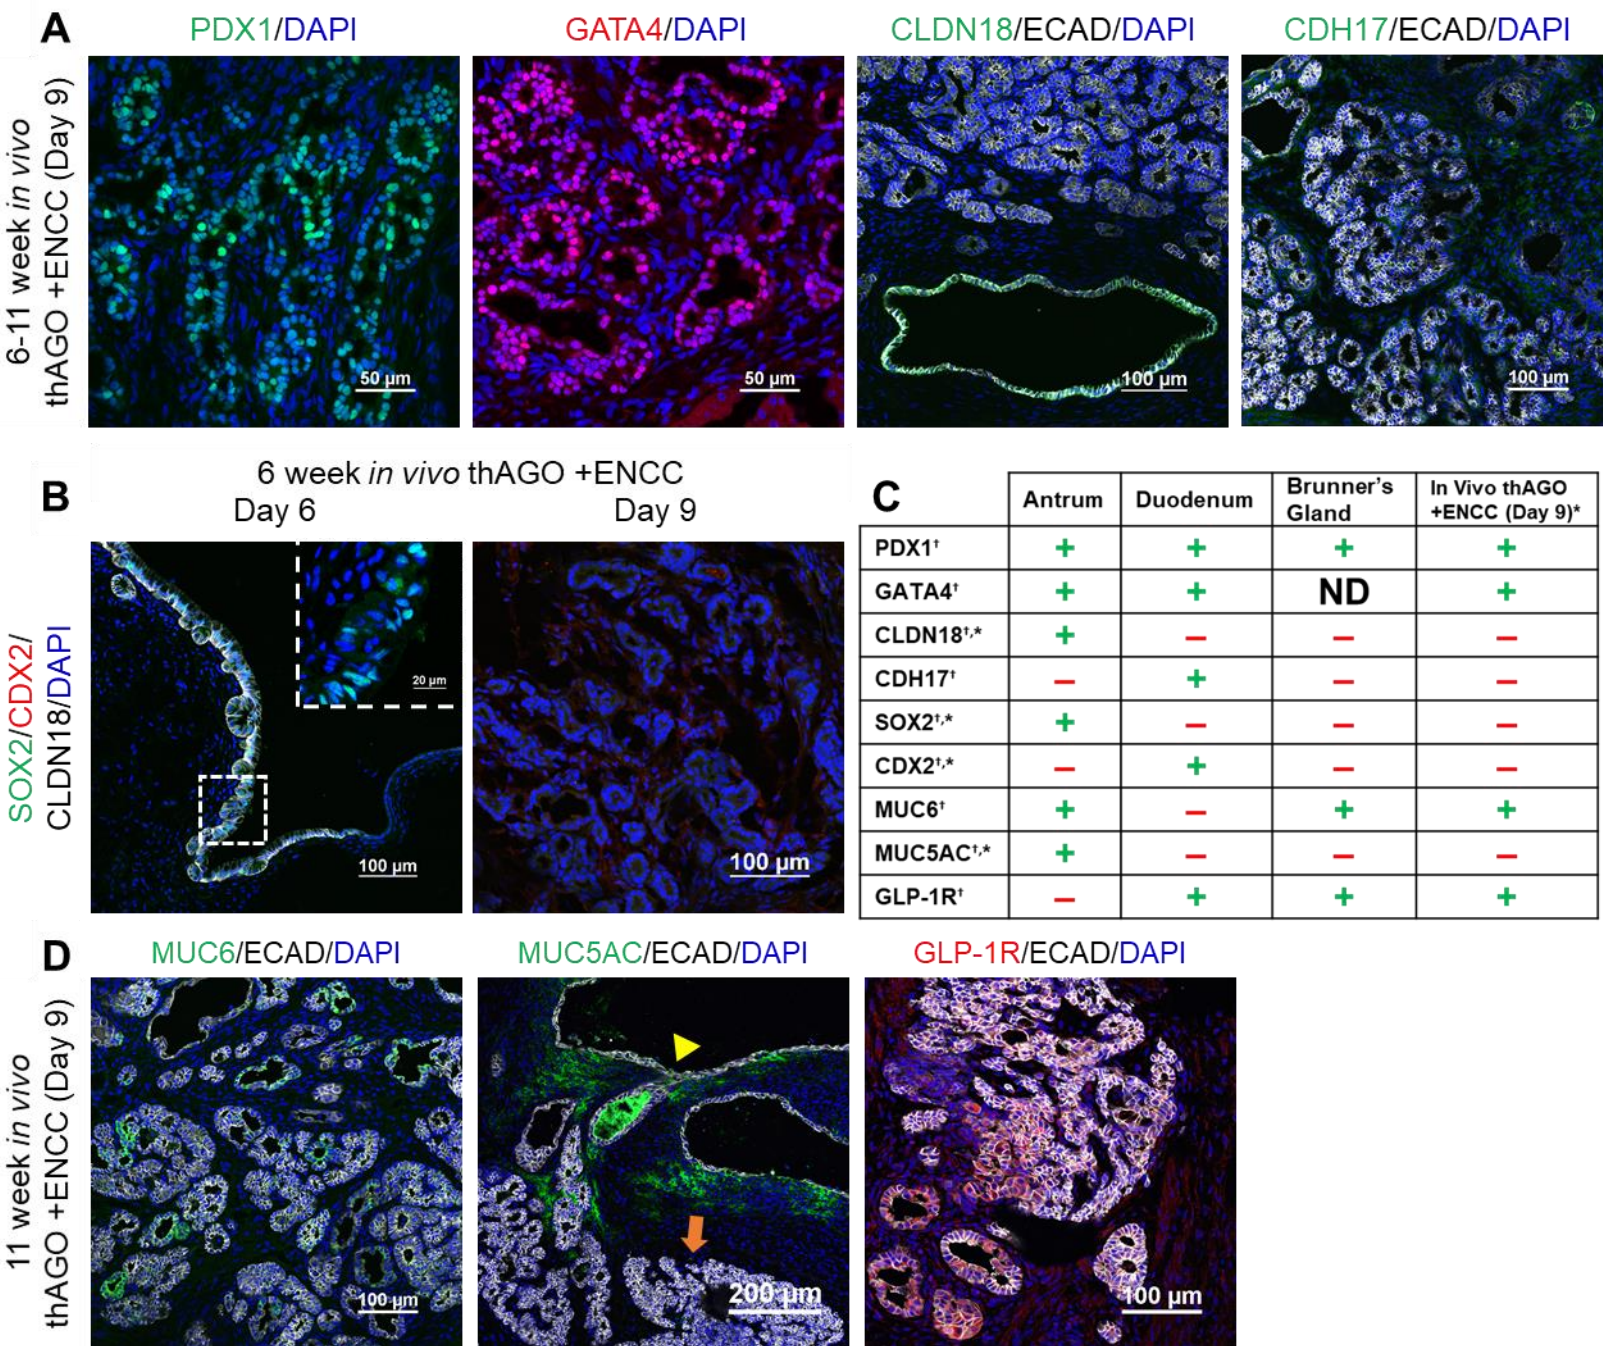

Source: https://biorxiv.org/content/10.1101/2021.07.15.452523v1.full.pdf
